# Supplementary material for: Pathogen Moonlighting Proteins: From Ancestral Key Metabolic Enzymes to Virulence Factors
Source: MDPI journal article supplement (doi:10.3390/microorganisms9061300), 2021-06-15
Supplement: s1 [file s1]

Table 17S. Shared GO codes

| Shared GO  | Frequency in total list (%) | Frequency in list with only virulence factors (%) | Filter used in list of metastasis proteins |
|------------|-----------------------------|---------------------------------------------------|--------------------------------------------|
| GO:0005102 | 6.93                        | 35.56                                             | None                                       |
| GO:0007155 | 6.02                        | 31.66                                             | None                                       |
| GO:0019899 | 3.45                        | 10.22                                             | None                                       |
| GO:0002020 | 0.72                        | 5.12                                              | None                                       |
| GO:0001968 | 0.39                        | 3.06                                              | None                                       |
| GO:0005518 | 0.22                        | 1.96                                              | None                                       |
| GO:0050840 | 0.23                        | 1.89                                              | None                                       |
| GO:0043236 | 0.15                        | 1.32                                              | None                                       |
| GO:0030246 | 0.29                        | 0.96                                              | None                                       |
| GO:0005102 | 27.78                       | 54.17                                             | Interaction with plasminogen               |
| GO:0002020 | 4.12                        | 11.11                                             | Interaction with plasminogen               |
| GO:0007155 | 5.56                        | 11.11                                             | Interaction with plasminogen               |
| GO:0001968 | 3.29                        | 9.72                                              | Interaction with plasminogen               |
| GO:0043236 | 1.44                        | 4.86                                              | Interaction with plasminogen               |
| GO:0019899 | 3.7                         | 4.17                                              | Interaction with plasminogen               |
| GO:0005539 | 1.03                        | 1.39                                              | Interaction with plasminogen               |
| GO:0008201 | 0.82                        | 1.39                                              | Interaction with plasminogen               |
| GO:0043394 | 0.41                        | 0.69                                              | Interaction with plasminogen               |
| GO:0005102 | 6.03                        | 31.71                                             | Tissue remodeling and regeneration         |
| GO:0007155 | 5.43                        | 29.27                                             | Tissue remodeling and regeneration         |
| GO:0019899 | 4.82                        | 14.63                                             | Tissue remodeling and regeneration         |
| GO:0002020 | 1.34                        | 9.76                                              | Tissue remodeling and regeneration         |
| GO:0005518 | 0.33                        | 3.05                                              | Tissue remodeling and regeneration         |
| GO:0030246 | 0.54                        | 1.83                                              | Tissue remodeling and regeneration         |
| GO:0003779 | 0.67                        | 1.22                                              | Tissue remodeling and regeneration         |
| GO:0005539 | 0.33                        | 1.22                                              | Tissue remodeling and regeneration         |
| GO:0008201 | 0.27                        | 1.22                                              | Tissue remodeling and regeneration         |
| GO:0043237 | 0.13                        | 1.22                                              | Tissue remodeling and regeneration         |
| GO:0001819 | 0.27                        | 0.61                                              | Tissue remodeling and regeneration         |
| GO:0004888 | 0.2                         | 0.61                                              | Tissue remodeling and regeneration         |
| GO:0008289 | 0.2                         | 0.61                                              | Tissue remodeling and regeneration         |
| GO:0043067 | 0.47                        | 0.61                                              | Tissue remodeling and regeneration         |
| GO:0043208 | 0.13                        | 0.61                                              | Tissue remodeling and regeneration         |
| GO:0050663 | 0.07                        | 0.61                                              | Tissue remodeling and regeneration         |
| GO:0051015 | 0.07                        | 0.61                                              | Tissue remodeling and regeneration         |
| GO:0007155 | 16.69                       | 37.16                                             | Interaction with extracellular matrix      |
| GO:0005102 | 11.55                       | 25.07                                             | Interaction with extracellular matrix      |
| GO:0002020 | 2.57                        | 7.71                                              | Interaction with extracellular matrix      |
| GO:0001968 | 2.24                        | 7.36                                              | Interaction with extracellular matrix      |
| GO:0050840 | 1.63                        | 5.7                                               | Interaction with extracellular matrix      |
| GO:0005518 | 1.28                        | 4.82                                              | Interaction with extracellular matrix      |
| GO:0043236 | 0.82                        | 3.07                                              | Interaction with extracellular matrix      |
| GO:0019899 | 1.89                        | 2.37                                              | Interaction with extracellular matrix      |
| GO:0008201 | 0.63                        | 1.18                                              | Interaction with extracellular matrix      |

Table 17S. Shared GO codes (*continued*)

| Shared GO  | Frequency in total list (%) | Frequency in list with only virulence factors (%) | Filter used in list of metastasis proteins |
|------------|-----------------------------|---------------------------------------------------|--------------------------------------------|
| GO:0030246 | 0.56                        | 0.79                                              | Interaction with extracellular matrix      |
| GO:0005539 | 0.35                        | 0.53                                              | Interaction with extracellular matrix      |
| GO:0044406 | 0.22                        | 0.48                                              | Interaction with extracellular matrix      |
| GO:0004888 | 0.28                        | 0.35                                              | Interaction with extracellular matrix      |
| GO:0043394 | 0.14                        | 0.26                                              | Interaction with extracellular matrix      |
| GO:0032722 | 0.09                        | 0.18                                              | Interaction with extracellular matrix      |
| GO:0043237 | 0.05                        | 0.18                                              | Interaction with extracellular matrix      |
| GO:0005102 | 6.89                        | 38.81                                             | Metabolism of glucose                      |
| GO:0007155 | 3.38                        | 19.54                                             | Metabolism of glucose                      |
| GO:0019899 | 5.01                        | 16.28                                             | Metabolism of glucose                      |
| GO:0001968 | 0.89                        | 7.6                                               | Metabolism of glucose                      |
| GO:0002020 | 0.7                         | 5.43                                              | Metabolism of glucose                      |
| GO:0043236 | 0.19                        | 1.9                                               | Metabolism of glucose                      |
| GO:0044406 | 0.26                        | 1.49                                              | Metabolism of glucose                      |
| GO:0008201 | 0.17                        | 0.81                                              | Metabolism of glucose                      |
| GO:0008289 | 0.25                        | 0.81                                              | Metabolism of glucose                      |
| GO:0004888 | 0.17                        | 0.54                                              | Metabolism of glucose                      |
| GO:0006897 | 0.11                        | 0.54                                              | Metabolism of glucose                      |
| GO:0003779 | 0.21                        | 0.41                                              | Metabolism of glucose                      |
| GO:0030246 | 0.11                        | 0.41                                              | Metabolism of glucose                      |
| GO:0050715 | 0.08                        | 0.41                                              | Metabolism of glucose                      |
| GO:0005539 | 0.07                        | 0.27                                              | Metabolism of glucose                      |
| GO:0030247 | 0.1                         | 0.27                                              | Metabolism of glucose                      |
| GO:0032722 | 0.06                        | 0.27                                              | Metabolism of glucose                      |
| GO:0050714 | 0.06                        | 0.27                                              | Metabolism of glucose                      |
| GO:0001819 | 0.06                        | 0.14                                              | Metabolism of glucose                      |
