# Supplementary material for: Pathogen Moonlighting Proteins: From Ancestral Key Metabolic Enzymes to Virulence Factors
Source: MDPI journal article supplement (doi:10.3390/microorganisms9061300), 2021-06-15
Supplement: s1 [file s1]

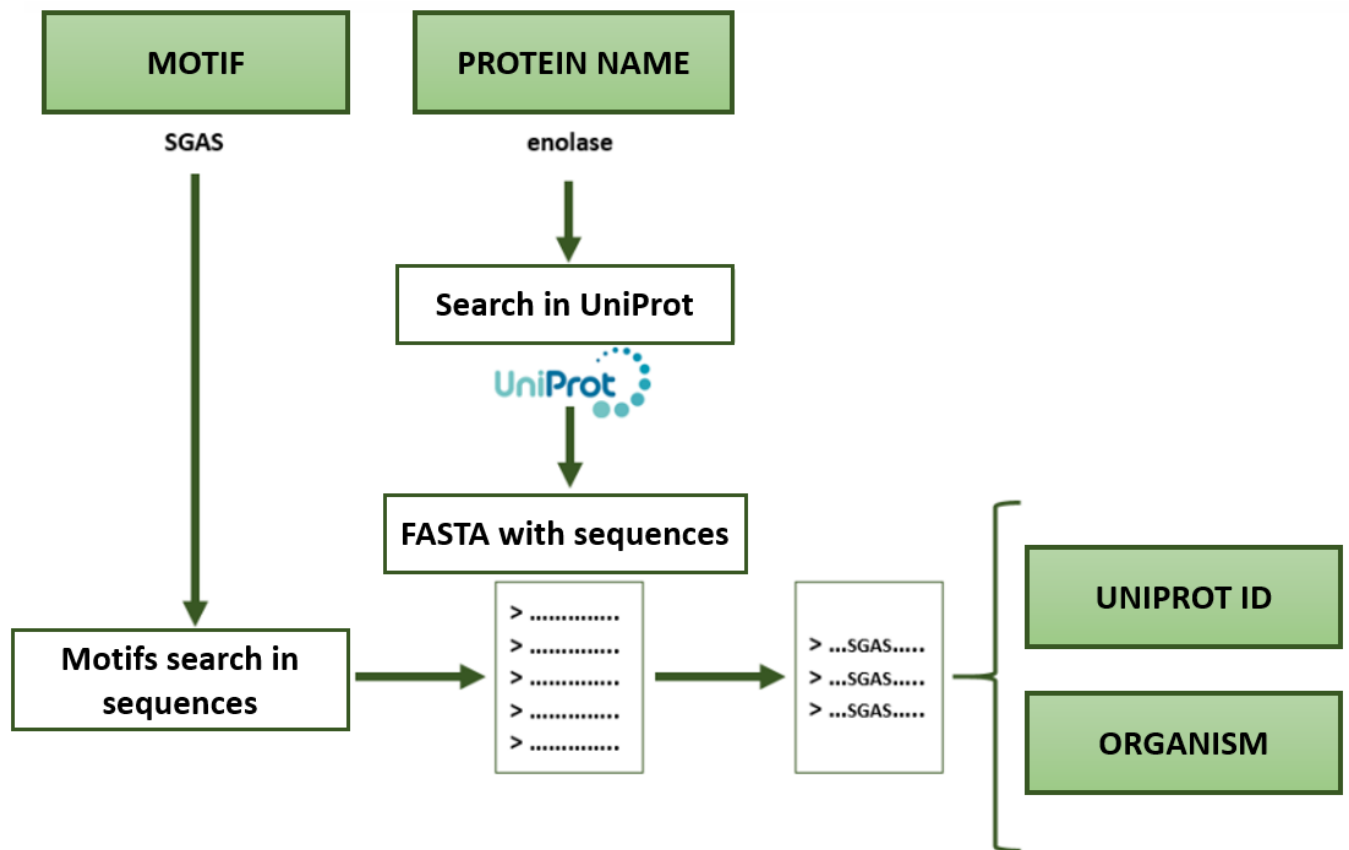

```

{
  "cells": [
    {
      "cell_type": "code",
      "execution_count": 7,
      "metadata": {},
      "outputs": [
        {
          "name": "stdout",
          "output_type": "stream",
          "text": [
            "Searching proteins...\n",
            "ID Uniprot: P0CC06 Microorganism: Dictyostelium discoideum \n",
            "ID Uniprot: Q61624 Microorganism: Mus musculus \n",
            "ID Uniprot: Q7NAY0 Microorganism: Mycoplasma gallisepticum (strain R(low / passage 15 / clone 2)) \n",
            "ID Uniprot: C3MPU0 Microorganism: Sulfolobus islandicus (strain L.S.2.15 / Lassen #1) \n",
            "ID Uniprot: C3N5G6 Microorganism: Sulfolobus islandicus (strain M.16.27) \n",
            "ID Uniprot: C3MUV2 Microorganism: Sulfolobus islandicus (strain M.14.25 / Kamchatka #1) \n",
            "ID Uniprot: C3NE30 Microorganism: Sulfolobus islandicus (strain Y.G.57.14 / Yellowstone #1) \n",
            "ID Uniprot: Q39T27 Microorganism: Geobacter metallireducens (strain GS-15 / ATCC 53774 / DSM 7210) \n",
            "ID Uniprot: C4KH32 Microorganism: Sulfolobus islandicus (strain M.16.4 / Kamchatka #3) \n",
            "ID Uniprot: C3NHN3 Microorganism: Sulfolobus islandicus (strain Y.N.15.51 / Yellowstone #2) \n",
            "ID Uniprot: B9M3M1 Microorganism: Geobacter daltonii (strain DSM 22248 / JCM 15807 / FRC-32) \n",
            "ID Uniprot: Q3AMB9 Microorganism: Synechococcus sp. (strain CC9605) \n",
            "ID Uniprot: A8FCG8 Microorganism: Bacillus pumilus (strain SAFR-032) \n"
          ]
        }
      ]
    }
  ],
  "source": [
    "import requests\n",
    "requests.__version__\n",
    "\n",
    "motif = 'PKK'\n",
    "name = 'enolase'\n",
    "\n"
  ]
}

```

```

def protein_finder(motif,name):\n",
"    BASE = 'http://www.uniprot.org'\n",
"    KB_ENDPOINT = '/uniprot/'\n",
"    payload = {'query': 'name: \''+name+'\" AND reviewed: yes',\n",
"              'format': 'fasta',\n",
"              }\n",
"    result = requests.get(BASE + KB_ENDPOINT, params=payload)
"    if result.ok: # Si la búsqueda ha ido bien:\n",
"        print('Searching proteins...') \n",
"    else: # Si se obtiene algún error a la hora de obtener el resultado de búsqueda, se indica el error:\n",
"        print('Something went wrong!', result.status_code)\n",
"    sequences = list(result.text.split('>'))
"    for i in range(0,len(sequences)):
"        mlen = len(motif)
"        seq = sequences[i]
"        slen = len(seq)
"        for s in range(0, slen-mlen+1):\n",
"            if seq[s:s+mlen] == motif:
"                id = seq.split('|')
"                nombre= id[1]
"                org = seq.split('=')
"                microorg= org[1].replace('OX', '')
"                print('ID Uniprot:', nombre, 'Microorganism:', microorg) # Se devuelve el ID y el microorganismo\n",
"                \n",
"protein_finder(motif,name)"
]
},
{
"cell_type": "code",
"execution_count": null,
"metadata": {},
"outputs": [],
"source": []
}
}

{
"cell_type": "code",
"execution_count": null,
"metadata": {},
"outputs": [],
"source": []
}
},
"metadata": {
"kernel_spec": {
"display_name": "Python 3",
"language": "python",
"name": "python3"
},
"language_info": {
"codemirror_mode": {
"name": "ipython",
"version": 3
},
"file_extension": ".py",
"mimetype": "text/x-python",
"name": "python",
"nbconvert_exporter": "python",
"pygments_lexer": "ipython3",
"version": "3.6.5"
}
},
"nbformat": 4,
"nbformat_minor": 2

```
