# Supplementary material for: Pathogen Moonlighting Proteins: From Ancestral Key Metabolic Enzymes to Virulence Factors
Source: Microorganisms. 2021 Jun 15;9(6):1300. doi: 10.3390/microorganisms9061300 (PMC8232316; doi:10.3390/microorganisms9061300)
Supplement: Supplementary file 1 [file microorganisms-09-01300-s001.zip]

Archive with 18 entries (18 files):
- Supplementary Information S1.xlsx
- Supplementary Information S10.xlsx
- Supplementary information S11.xlsx
- Supplementary Information S12.xlsx
- Supplementary Information S13.xlsx
- Supplementary Information S14.pdf
- Supplementary Information S15.pdf
- Supplementary Information S16.pdf
- Supplementary Information S17.pdf
- Supplementary Information S18.jpg
- Supplementary Information S2.pdf
- Supplementary Information S3.xlsx
- Supplementary Information S4.pdf
- Supplementary Information S5.xlsx
- Supplementary Information S6.pdf
- Supplementary Information S7.xlsx
- Supplementary Information S8.xlsx
- Supplementary Information S9.xlsx
