# Supplementary material for: Pathogen Moonlighting Proteins: From Ancestral Key Metabolic Enzymes to Virulence Factors
Source: Microorganisms. 2021 Jun 15;9(6):1300. doi: 10.3390/microorganisms9061300 (PMC8232316; doi:10.3390/microorganisms9061300)
Supplement: Supplementary file 1 [file microorganisms-09-01300-s001.zip › Supplementary Information S1.xlsx]

## Sheet: Virulence moon
ID	Uni Prot	Uniprot			Protein Name	Canonical Function	Moonlighting Function	Organism
343	P30575	P30575	http://www.uniprot.org/uniprot/P30575	http://www.uniprot.org/uniprot/	Enolase	Glycolysis	Plasminogen binding	Candida albicans
395	Q043Z5	Q043Z5	http://www.uniprot.org/uniprot/Q043Z5	http://www.uniprot.org/uniprot/	Enolase	Glycolisis	Adhesion to host.	Lactobacillus gasseri
465	I3WHD5	I3WHD5	http://www.uniprot.org/uniprot/I3WHD5	http://www.uniprot.org/uniprot/	Enolase	Glycolisis	Binding to plasmin(ogen)	Bifidobacterium bifidum
466	F9XY86	F9XY86	http://www.uniprot.org/uniprot/F9XY86	http://www.uniprot.org/uniprot/	Enolase	Glycolisis	Binding to plasmin(ogen)	Bifidobacterium breve
467	B3DSV2	B3DSV2	http://www.uniprot.org/uniprot/B3DSV2	http://www.uniprot.org/uniprot/	Enolase	Glycolisis	Binding to plasmin(ogen)	Bifidobacterium longum
468	P75189	P75189	http://www.uniprot.org/uniprot/P75189	http://www.uniprot.org/uniprot/	Enolase	Glycolisis	Binding to plasmin(ogen)	Mycoplasma pneumoniae
469	T1ZUS9	T1ZUS9	http://www.uniprot.org/uniprot/T1ZUS9	http://www.uniprot.org/uniprot/	Enolase	Glycolisis	Binding to plasmin(ogen)	Streptococcus anginosus
470	C1KY94	C1KY94	http://www.uniprot.org/uniprot/C1KY94	http://www.uniprot.org/uniprot/	Enolase	Glycolisis	Binding to plasmin(ogen)	Listeria monocytogenes
471	Q9XDS7	Q9XDS7	http://www.uniprot.org/uniprot/Q9XDS7	http://www.uniprot.org/uniprot/	Enolase	Glycolisis	Binding to plasmin(ogen)	Streptococcus anginosus
472	F2QDA9	F2QDA9	http://www.uniprot.org/uniprot/F2QDA9	http://www.uniprot.org/uniprot/	Enolase	Glycolisis	Binding to plasmin(ogen)	Streptococcus oralis
473	A4W2T1	A4W2T1	http://www.uniprot.org/uniprot/A4W2T1	http://www.uniprot.org/uniprot/	Enolase	Glycolisis	Binding to intestinal epithelial cells	Streptococcus suis
500	Q4YQJ5	Q4YQJ5	http://www.uniprot.org/uniprot/Q4YQJ5	http://www.uniprot.org/uniprot/	Enolase	Glycolysis	Binds to the surface of the mosquito midgut epithelium	Plasmodium berghei
504	B8Q027	B8Q027	http://www.uniprot.org/uniprot/B8Q027	http://www.uniprot.org/uniprot/	Enolase	Glycolysis	Supress the immune response in insects	Steinernema glaseri
509	P0DM31	P0DM31	http://www.uniprot.org/uniprot/P0DM31	http://www.uniprot.org/uniprot/	Enolase	Glycolisis	Associated with epithelial cell binding	Enterococcus faecalis
558	Q9UAE6	Q9UAE6	http://www.uniprot.org/uniprot/Q9UAE6	http://www.uniprot.org/uniprot/	Enolase	2-phospho-D-glycerate = phosphoenolpyruvate + H2O.	Specifically binds to a TTTTCT DNA motif present in the cyst matrix antigen 1	Toxoplasma gondii
563	T1WGD6	T1WGD6	http://www.uniprot.org/uniprot/T1WGD6	http://www.uniprot.org/uniprot/	Enolase	Glycolisis	Binding to plasminogen	Taenia pisiformis
569	T1TFA0	T1TFA0	http://www.uniprot.org/uniprot/T1TFA0	http://www.uniprot.org/uniprot/	Enolase	Glycolisis	Adhesion to host. It is an Effective Protective Antigen in Mice	Streptococcus iniae
608	U3THT2	U3THT2	http://www.uniprot.org/uniprot/U3THT2	http://www.uniprot.org/uniprot/	Enolase	Glycolysis	Plasminogen binding.	Streptococcus dysgalactiae subsp equisimilis
611	Q845Q5	Q845Q5	http://www.uniprot.org/uniprot/Q845Q5	http://www.uniprot.org/uniprot/	Enolase	Glycolisis	Is an immunosuppressive protein	Streptococcus sobrinus
630	P9WNL1	P9WNL1	http://www.uniprot.org/uniprot/P9WNL1	http://www.uniprot.org/uniprot/	Enolase	Glycolisis	Binds to plasminogen.	Mycobacterium tuberculosis
38	A8VHK4	A8VHK4	http://www.uniprot.org/uniprot/A8VHK4	http://www.uniprot.org/uniprot/	Enolase (Alpha-enolase) EC:4.2.1.11	Conversion of 2-phosphoglycerate to phosphoenolpyruvate (Glycolysis)	Plasminogen binding	Mycoplasma fermentans
322	P69949	P69949	http://www.uniprot.org/uniprot/P69949	http://www.uniprot.org/uniprot/	Enolase EC: 4.2.1.11.	Glycolisis	Plasminogen binding	Streptococcus pyogenes
333	C0S1J2	C0S1J2	http://www.uniprot.org/uniprot/C0S1J2	http://www.uniprot.org/uniprot/	Enolase EC: 4.2.1.11.	Glycolysis	Fibronectin binding	Paracoccidioides brasiliensis
344	Q5K117	Q5K117	http://www.uniprot.org/uniprot/Q5K117	http://www.uniprot.org/uniprot/	Enolase EC: 4.2.1.11.	Glycolysis	Plasminogen and laminin binding	Lactobacillus crispatus
345	Q7YZX3	Q7YZX3	http://www.uniprot.org/uniprot/Q7YZX3	http://www.uniprot.org/uniprot/	Enolase EC: 4.2.1.11.	Glycolysis	Plasminogen binding	Onchocerca volvulus
346	E7GW07	E7GW07	http://www.uniprot.org/uniprot/E7GW07	http://www.uniprot.org/uniprot/	Enolase EC: 4.2.1.11.	Glycolysis	Plasminogen binding	Oral streptococci
347	Q8DTS9	Q8DTS9	http://www.uniprot.org/uniprot/Q8DTS9	http://www.uniprot.org/uniprot/	Enolase EC: 4.2.1.11.	Glycolysis	Plasminogen binding. Binding to salivary mucin.	Streptococcus mutans
348	Q3HL75	Q3HL75	http://www.uniprot.org/uniprot/Q3HL75	http://www.uniprot.org/uniprot/	Enolase EC: 4.2.1.11.	Glycolysis	Plasminogen binding	Leishmania mexicana
29	Q27727	Q27727	http://www.uniprot.org/uniprot/Q27727	http://www.uniprot.org/uniprot/	Enolase EC:4.2.1.11	Conversion of 2-phosphoglycerate to phosphoenolpyruvate (Glycolysis)	It may be involved in a host of other biological functions.	Plasmodium falciparum
31	Q97QS2	Q97QS2	http://www.uniprot.org/uniprot/Q97QS2	http://www.uniprot.org/uniprot/	Enolase EC:4.2.1.11	Conversion of 2-phosphoglycerate to phosphoenolpyruvate (Glycolysis)	Plasminogen binding	Streptococcus pneumoniae
33	C3LDI0	C3LDI0	http://www.uniprot.org/uniprot/C3LDI0	http://www.uniprot.org/uniprot/	Enolase EC:4.2.1.11	Conversion of 2-phosphoglycerate to phosphoenolpyruvate (Glycolysis)	Plasminogen binding	Bacillus anthracis
34	D3R5K8	D3R5K8	http://www.uniprot.org/uniprot/D3R5K8	http://www.uniprot.org/uniprot/	Enolase EC:4.2.1.11	Conversion of 2-phosphoglycerate to phosphoenolpyruvate (Glycolysis)	Plasminogen binding	Bifidobacterium animalis subsp. lactis
35	O51312	O51312	http://www.uniprot.org/uniprot/O51312	http://www.uniprot.org/uniprot/	Enolase EC:4.2.1.11	Conversion of 2-phosphoglycerate to phosphoenolpyruvate (Glycolysis)	Binding to plasminogen	Borrelia burgdorferi
36	D6S5V6	D6S5V6	http://www.uniprot.org/uniprot/D6S5V6	http://www.uniprot.org/uniprot/	Enolase EC:4.2.1.11	Conversion of 2-phosphoglycerate to phosphoenolpyruvate (Glycolysis)	Inhibitor of Neisseria binding	Lactobacillus johnsonii
37	Q5NJY7	Q5NJY7	http://www.uniprot.org/uniprot/Q5NJY7	http://www.uniprot.org/uniprot/	Enolase EC:4.2.1.11	Conversion of 2-phosphoglycerate to phosphoenolpyruvate (Glycolysis)	Fibronectin binding	Lactobacillus plantarum
39	C6SKU1	C6SKU1	http://www.uniprot.org/uniprot/C6SKU1	http://www.uniprot.org/uniprot/	Enolase EC:4.2.1.11	Conversion of 2-phosphoglycerate to phosphoenolpyruvate (Glycolysis)	Plasminogen binding	Neisseria meningitidis
40	V9W1Z1	V9W1Z1	http://www.uniprot.org/uniprot/V9W1Z1	http://www.uniprot.org/uniprot/	Enolase EC:4.2.1.11	Conversion of 2-phosphoglycerate to phosphoenolpyruvate (Glycolysis)	A role in virulence: it could be involved in larval degradation	Paenibacillus larvae subsp. larvae
41	O69174	O69174	http://www.uniprot.org/uniprot/O69174	http://www.uniprot.org/uniprot/	Enolase EC:4.2.1.11	Conversion of 2-phosphoglycerate to phosphoenolpyruvate (Glycolysis)	Laminin binding protein	Staphylococcus aureus
42	A8AY46	A8AY46	http://www.uniprot.org/uniprot/A8AY46	http://www.uniprot.org/uniprot/	Enolase EC:4.2.1.11	Conversion of 2-phosphoglycerate to phosphoenolpyruvate (Glycolysis)	Binding to salivary mucin MUC7	Streptococcus gordonii
43	C6GGT7	C6GGT7	http://www.uniprot.org/uniprot/C6GGT7	http://www.uniprot.org/uniprot/	Enolase EC:4.2.1.11	Conversion of 2-phosphoglycerate to phosphoenolpyruvate (Glycolysis)	Fibronectin binding protein/adhesin	Streptococcus suis
44	Q5EFD8	Q5EFD8	http://www.uniprot.org/uniprot/Q5EFD8	http://www.uniprot.org/uniprot/	Enolase EC:4.2.1.11	Conversion of 2-phosphoglycerate to phosphoenolpyruvate (Glycolysis)	Plasminogen binding	Trichomonas vaginalis
32	Q8GE63	Q8GE63	http://www.uniprot.org/uniprot/Q8GE63	http://www.uniprot.org/uniprot/	Enolase EC:4.2.1.11	Glycolisis	Plasminogen binding	Aeromonas hydrophila
166	D5GYN9	D5GYN9	http://www.uniprot.org/uniprot/D5GYN9	http://www.uniprot.org/uniprot/	Glutamine Synthetase	Synthesis of Glutamine	Binding to plasmin(ogen); Binding to collagen I and laminin	Lactobacillus crispatus
359	P9WN39	P9WN39	http://www.uniprot.org/uniprot/P9WN39	http://www.uniprot.org/uniprot/	Glutamine Synthetase	Glutamine synthetase ATP + L-glutamate + NH3 => ADP + phosphate + L-glutamine	Plasminogen and fibronectin binding	Mycobacterium tuberculosis
360	C2GUH0	C2GUH0	http://www.uniprot.org/uniprot/C2GUH0	http://www.uniprot.org/uniprot/	Glutamine Synthetase	Glutamine Synthetase	Plasminogen binding	Bifidobacterium lactis
689	C2GUH0	C2GUH0	http://www.uniprot.org/uniprot/C2GUH0	http://www.uniprot.org/uniprot/	Glutamine synthetase	ATP + L-glutamate + NH3 = ADP + phosphate + L-glutamine.	Plasminogen binding	Bifidobacterium longum
690	A0A0H2Q1X0	A0A0H2Q1X0	http://www.uniprot.org/uniprot/A0A0H2Q1X0	http://www.uniprot.org/uniprot/	Glutamine synthetase	ATP + L-glutamate + NH3 = ADP + phosphate + L-glutamine.	Plasminogen binding	Bifidobacterium bifidum
461	T1ZXN3	T1ZXN3	http://www.uniprot.org/uniprot/T1ZXN3	http://www.uniprot.org/uniprot/	Glyceraldehyde-3-phosphate dehydrogenase	Glycolisis	Binding to Plasminogen	Streptococcus anginosus
463	P94915	P94915	http://www.uniprot.org/uniprot/P94915	http://www.uniprot.org/uniprot/	Glyceraldehyde-3-phosphate dehydrogenase	Glycolisis	EGF-receptor	Mycobacterium avium
486	I6L8L9	I6L8L9	http://www.uniprot.org/uniprot/I6L8L9	http://www.uniprot.org/uniprot/	Glyceraldehyde-3-phosphate dehydrogenase	Glycolisis	Binds to peptidoglycan. Cells depends on the LytA-mediated lysis	Streptococcus pneumoniae
555	Q92211	Q92211	http://www.uniprot.org/uniprot/Q92211	http://www.uniprot.org/uniprot/	Glyceraldehyde-3-phosphate dehydrogenase	Glycolisis	Adhesion and invasion processes (fribronectin, laminin and type I collagen binding)	Candida albicans
616	F5WV05	F5WV05	http://www.uniprot.org/uniprot/F5WV05	http://www.uniprot.org/uniprot/	Glyceraldehyde-3-phosphate dehydrogenase	Glycolisis	Adhesin. Binding to fibronectin and plasminogen.	Erysipelothrix rhusiopathiae
688	C6S993	C6S993	http://www.uniprot.org/uniprot/C6S993	http://www.uniprot.org/uniprot/	Glyceraldehyde-3-phosphate dehydrogenase	Glycolysis	Adhesion to host.	Neisseria meningitidis
88	Q97QS2	Q97QS2	http://www.uniprot.org/uniprot/Q97QS2	http://www.uniprot.org/uniprot/	Glyceraldehyde-3-phosphate dehydrogenase EC:1.2.1.12	Glycolisis	Plasminogen binding protein / Adhesin for mucin	Streptococcus pneumoniae
90	J7M6M6	J7M6M6	http://www.uniprot.org/uniprot/J7M6M6	http://www.uniprot.org/uniprot/	Glyceraldehyde-3-phosphate dehydrogenase EC:1.2.1.12	Glycolisis	Fibronectin binding protein - Plasminogen binding protein	Streptococcus pyogenes
91	F2QGM8	F2QGM8	http://www.uniprot.org/uniprot/F2QGM8	http://www.uniprot.org/uniprot/	Glyceraldehyde-3-phosphate dehydrogenase EC:1.2.1.12	Glycolisis	Binds major fimbriae of Porphyromonas gingivalis.	Streptococcus oralis
92	J8T291	J8T291	http://www.uniprot.org/uniprot/J8T291	http://www.uniprot.org/uniprot/	Glyceraldehyde-3-phosphate dehydrogenase EC:1.2.1.12	Glycolisis	Immunomodulator (is reported to function as a virulence factor with B lymphocyte)	Streptococcus agalactiae
93	C8UPL3	C8UPL3	http://www.uniprot.org/uniprot/C8UPL3	http://www.uniprot.org/uniprot/	Glyceraldehyde-3-phosphate dehydrogenase EC:1.2.1.12	Glycolisis	Bind plasminogen and fibrinogen - NAD-ribosylating activity.	Escherichia coli
299	Q81UL6	Q81UL6	http://www.uniprot.org/uniprot/Q81UL6	http://www.uniprot.org/uniprot/	Glyceraldehyde-3-phosphate dehydrogenase EC:1.2.1.12	Glycolisis	Plasminogen binding	Bacillus anthracis
306	D5H2B9	D5H2B9	http://www.uniprot.org/uniprot/D5H2B9	http://www.uniprot.org/uniprot/	Glyceraldehyde-3-phosphate dehydrogenase EC:1.2.1.12	Glycolisis	Binding to Plasminogen	Lactobacillus crispatus
310	Q88YH6	Q88YH6	http://www.uniprot.org/uniprot/Q88YH6	http://www.uniprot.org/uniprot/	Glyceraldehyde-3-phosphate dehydrogenase EC:1.2.1.12	Glycolisis	Binding to Plasminogen	Lactobacillus plantarum
313	L8DW58	L8DW58	http://www.uniprot.org/uniprot/L8DW58	http://www.uniprot.org/uniprot/	Glyceraldehyde-3-phosphate dehydrogenase EC:1.2.1.12	Glycolisis	Binding to Plasminogen	Listeria monocytogenes
318	Q8CPY5	Q8CPY5	http://www.uniprot.org/uniprot/Q8CPY5	http://www.uniprot.org/uniprot/	Glyceraldehyde-3-phosphate dehydrogenase EC:1.2.1.12	Glycolisis	Plasminogen binding. Transferrin-binding protein.	Staphylococcus epidermidis
320	Q59906	Q59906	http://www.uniprot.org/uniprot/Q59906	http://www.uniprot.org/uniprot/	Glyceraldehyde-3-phosphate dehydrogenase EC:1.2.1.12	Glycolisis	Plasminogen binding	Streptococcus equisimilis
323	A2DHT2	A2DHT2	http://www.uniprot.org/uniprot/A2DHT2	http://www.uniprot.org/uniprot/	Glyceraldehyde-3-phosphate dehydrogenase EC:1.2.1.12	Glycolisis	Binds fibronectin and plasminogen and collagen	Trichomonas vaginalis
351	P52987	P52987	http://www.uniprot.org/uniprot/P52987	http://www.uniprot.org/uniprot/	Glyceraldehyde-3-phosphate dehydrogenase EC:1.2.1.12	Glycolysis	Binding to invertase, a mannoprotein of Saccharomyces	Lactococcus lactis
352	Q8X1X3	Q8X1X3	http://www.uniprot.org/uniprot/Q8X1X3	http://www.uniprot.org/uniprot/	Glyceraldehyde-3-phosphate dehydrogenase EC:1.2.1.12	Glycolysis	Binds fibronectin, laminin and type II collagen	Paracoccidioides brasiliensis
510	F0PHG6	F0PHG6	http://www.uniprot.org/uniprot/F0PHG6	http://www.uniprot.org/uniprot/	Glyceraldehyde-3-phosphate dehydrogenase EC:1.2.1.12	Glycolisis	Associated with epithelial cell binding	Enterococcus faecalis
598	Q05G10	Q05G10	http://www.uniprot.org/uniprot/Q05G10	http://www.uniprot.org/uniprot/	Glyceraldehyde-3-phosphate dehydrogenase EC:1.2.1.12	Glycolisis	Is involved in the adhesion to erythrocytes.	Mycoplasma suis
605	B2LXU3	B2LXU3	http://www.uniprot.org/uniprot/B2LXU3	http://www.uniprot.org/uniprot/	Glyceraldehyde-3-phosphate dehydrogenase EC:1.2.1.12	Glycolisis	Binding to plasminogen.	Schistosoma bovis
353	Q3Y454	Q3Y454	http://www.uniprot.org/uniprot/Q3Y454	http://www.uniprot.org/uniprot/	Glyceraldehyde-3-phosphate dehydrogenase EC:1.2.1.13	Glycolysis	Plasminogen binding. Binding to albumin. Binding to porcine tracheal rings.	Streptococcus suis
356	Q81X74	Q81X74	http://www.uniprot.org/uniprot/Q81X74	http://www.uniprot.org/uniprot/	Glyceraldehyde-3-phosphate dehydrogenase EC:1.2.1.17	Glycolysis	Plasminogen binding	Bacillus anthracis
357	P47543	P47543	http://www.uniprot.org/uniprot/P47543	http://www.uniprot.org/uniprot/	Glyceraldehyde-3-phosphate dehydrogenase EC:1.2.1.18	Glycolysis	Mucin binding	Mycoplasma genitalium
358	Q1J8I3	Q1J8I3	http://www.uniprot.org/uniprot/Q1J8I3	http://www.uniprot.org/uniprot/	Glyceraldehyde-3-phosphate dehydrogenase EC:1.2.1.19	Glycolysis	Plasminogen binding	Streptococcus pyogenes
464	P9WN83	P9WN83	http://www.uniprot.org/uniprot/P9WN83	http://www.uniprot.org/uniprot/	Glyceraldehyde-3-phosphate dehydrogenase EC:1.2.1.26	Glycolisis	EGF-receptor	Mycobacterium tuberculosis
284	Q8DR54	Q8DR54	http://www.uniprot.org/uniprot/Q8DR54	http://www.uniprot.org/uniprot/	6PGD (6-phosphogluconate dehydrogenase) EC:1.1.1.44	Catalyzes the oxidative decarboxylation of 6-phosphogluconate	Putative adhesin	Streptococcus pneumoniae
612	R4NMT9	R4NMT9	http://www.uniprot.org/uniprot/R4NMT9	http://www.uniprot.org/uniprot/	6-phosphogluconate dehydrogenase	Catalyzes the oxidative decarboxylation of 6-phosphogluconate to ribulose 5-phosphate	Adhesion to host, unknow receptor.	Streptococcus suis
244	Q6Q3I2	Q6Q3I2	http://www.uniprot.org/uniprot/Q6Q3I2	http://www.uniprot.org/uniprot/	Alcohol acetaldehyde dehydrogenase	Acetaldehyde dehydrogenase (acetylating)	Binding to Caco-2 cells & Binding to eukaryotic Hsp60	Listeria monocytogenes
338	Q24803	Q24803	http://www.uniprot.org/uniprot/Q24803	http://www.uniprot.org/uniprot/	Alcohol dehydrogenase (EhADH2)	Alcohol dehydrogenase	Binds fibronectin, laminin and type II collagen	Enteamoeba histolytica
337	P43067	P43067	http://www.uniprot.org/uniprot/P43067	http://www.uniprot.org/uniprot/	Alcohol dehydrogenase 1	An alcohol + NAD+ = an aldehyde or ketone + NADH	Plasminogen binding (humans plasminogen)	Candida albicans
551	Q96UH7	Q96UH7	http://www.uniprot.org/uniprot/Q96UH7	http://www.uniprot.org/uniprot/	Aldolase	Glycolisis	Plasminogen binding	Paracoccidioides brasiliensis
18	Q968V9	Q968V9	http://www.uniprot.org/uniprot/Q968V9	http://www.uniprot.org/uniprot/	Aldolase EC:4.1.2.13	Splits the fructose 1,6-bisphosphate, into dihydroxyacetone phosphate & glyceral	Host cell invasive	Plasmodium Vivax
19	B9PW35	B9PW35	http://www.uniprot.org/uniprot/B9PW35	http://www.uniprot.org/uniprot/	Aldolase EC:4.1.2.13	Splits the fructose 1,6-bisphosphate, into dihydroxyacetone phosphate & glyceral	It is essential for efficient host cell invasion	Toxoplasma gondii
20	P0A4S2	P0A4S2	http://www.uniprot.org/uniprot/P0A4S2	http://www.uniprot.org/uniprot/	Aldolase EC:4.1.2.13	Splits the fructose 1,6-bisphosphate, into dihydroxyacetone phosphate & glyceral	It is a cell surface lectin which binds host cadherin receptor termed flamingo	Streptococcus pneumoniae R6
21	C6SIV9	C6SIV9	http://www.uniprot.org/uniprot/C6SIV9	http://www.uniprot.org/uniprot/	Aldolase EC:4.1.2.13	Splits the fructose 1,6-bisphosphate, into dihydroxyacetone phosphate & glyceral	It is a cell surface protein involved in cell adherence	Neisseria meningitidis
335	Q07636	Q07636	http://www.uniprot.org/uniprot/Q07636	http://www.uniprot.org/uniprot/	ATP-dependent 6-phosphofructokinase	Glycolysis	Binding to invertase, a mannoprotein of Saccharomyces	Lactococcus lactis
336	F2QDT8	F2QDT8	http://www.uniprot.org/uniprot/F2QDT8	http://www.uniprot.org/uniprot/	ATP-dependent 6-phosphofructokinase	Phosphofructokinase	Plasminogen binding	Streptococcus oralis
492	P63788	P63788	http://www.uniprot.org/uniprot/P63788	http://www.uniprot.org/uniprot/	ATP-dependent Clp protease proteolytic subunit	Cleaves peptides in various proteins in a process that requires ATP hydrolysis.	Binding of plasmin(ogen) & Binding to fibronectin	Streptococcus pneumoniae
590	C7C076	C7C076	http://www.uniprot.org/uniprot/C7C076	http://www.uniprot.org/uniprot/	ATP-dependent protease subunit HslV	Chaperone	Adhesion to host, unknow receptor.	Helicobacter pylori
625	P06653	P06653	http://www.uniprot.org/uniprot/P06653	http://www.uniprot.org/uniprot/	Autolysin, LytA	Autolysins are involved in some important biological processes such as cell separation	Inhibits C3 convertase formation and reduces opsonization by iC3b	Streptococcus pneumoniae
623	Q9KGU0	Q9KGU0	http://www.uniprot.org/uniprot/Q9KGU0	http://www.uniprot.org/uniprot/	Beta-galactosidase	Beta-galactosidase activity	Deglycosylate complement components	Streptococcus pneumoniae
624	P49610	P49610	http://www.uniprot.org/uniprot/P49610	http://www.uniprot.org/uniprot/	Beta-N-acetylhexosaminidase	Hydrolysis of terminal non-reducing N-acetyl-D-hexosamine residues	Deglycosylate complement components	Streptococcus pneumoniae
656	Q9KK62	Q9KK62	http://www.uniprot.org/uniprot/Q9KK62	http://www.uniprot.org/uniprot/	Bile salt hydrolase	Choloylglycine hydrolase activity	Plasminogen binding	Bifidobacterium lactis
450	B1N649	B1N649	http://www.uniprot.org/uniprot/B1N649	http://www.uniprot.org/uniprot/	CbpA	Surface proteins noncovalently bound to the phosphorylcholine moiety of the cell	Virulence (colonization of the nasopharynx)	Streptococcus pneumoniae
451	B2INL9	B2INL9	http://www.uniprot.org/uniprot/B2INL9	http://www.uniprot.org/uniprot/	Choline binding protein D	Surface proteins noncovalently bound to the phosphorylcholine moiety of the cell	Virulence (colonization of the nasopharynx)	Streptococcus pneumoniae
452	B8ZP33	B8ZP33	http://www.uniprot.org/uniprot/B8ZP33	http://www.uniprot.org/uniprot/	Choline binding protein E	Surface proteins noncovalently bound to the phosphorylcholine moiety of the cell	Virulence (colonization of the nasopharynx)	Streptococcus pneumoniae
453	B2ILT3	B2ILT3	http://www.uniprot.org/uniprot/B2ILT3	http://www.uniprot.org/uniprot/	Choline binding protein G	Surface proteins noncovalently bound to the phosphorylcholine moiety of the cell	Virulence (colonization of the nasopharynx)	Streptococcus pneumoniae
241	Q5H4Y2	Q5H4Y2	http://www.uniprot.org/uniprot/Q5H4Y2	http://www.uniprot.org/uniprot/	Chorismate mutase EC:5.4.99.5	Catalyzes the Claisen rearrangement of chorismate to prephenate	Involved in virulence (not yet defined, it may imply an important role in bacteria	Xanthomonas oryzae
381	P9WQP3	P9WQP3	http://www.uniprot.org/uniprot/P9WQP3	http://www.uniprot.org/uniprot/	Diacylglycerol acyltransferase/mycolyltransferase Ag85A	Diacylglycerol acyltransferase	Fibronectin binding.	Mycobacterium tuberculosis
490	P9WQP3	P9WQP3	http://www.uniprot.org/uniprot/P9WQP3	http://www.uniprot.org/uniprot/	Diacylglycerol acyltransferase/mycolyltransferase Ag85A	They catalyze the transfer of a mycoloyl residue	Binding of plasmi(ogen) & Binding to fibronectin	Mycobacterium tuberculosis
249	P9WQP1	P9WQP1	http://www.uniprot.org/uniprot/P9WQP1	http://www.uniprot.org/uniprot/	Diacylglycerol acyltransferase/mycolyltransferase Ag85B	Transferase activity	Fibronectin binding proteins	Mycobacterium tuberculosis
382	P9WQP1	P9WQP1	http://www.uniprot.org/uniprot/P9WQP1	http://www.uniprot.org/uniprot/	Diacylglycerol acyltransferase/mycolyltransferase Ag85B	Diacylglycerol acyltransferase	Fibronectin binding.	Mycobacterium tuberculosis
383	P9WQN9	P9WQN9	http://www.uniprot.org/uniprot/P9WQN9	http://www.uniprot.org/uniprot/	Diacylglycerol acyltransferase/mycolyltransferase Ag85C	Diacylglycerol acyltransferase	fibronectin binding.	Mycobacterium tuberculosis
491	A8AZI3	A8AZI3	http://www.uniprot.org/uniprot/A8AZI3	http://www.uniprot.org/uniprot/	DNA-directed RNA polymerase subunit beta	DNA-dependent RNA polymerase catalyzes the transcription of DNA into RNA	Binding to salivary mucin	Streptococcus gordonii
485	C1KVC0	C1KVC0	http://www.uniprot.org/uniprot/C1KVC0	http://www.uniprot.org/uniprot/	DnaK	Acts as a chaperone	Binding to plasmin(ogen)	Listeria monocytogenes
369	P0CY35	P0CY35	http://www.uniprot.org/uniprot/P0CY35	http://www.uniprot.org/uniprot/	Elongation factor 1-alpha 1	This protein promotes the GTP-dependent binding of aminoacyl-tRNA	Plasminogen binding.	Candida albicans
404	A8AUR6	A8AUR6	http://www.uniprot.org/uniprot/A8AUR6	http://www.uniprot.org/uniprot/	Elongation factor G	Catalyzes the GTP-dependent ribosomal translocation step during translation elongation	Adhesin, binds to salivary Mucin MUC7	Streptococcus gordonii
314	P23568	P23568	http://www.uniprot.org/uniprot/P23568	http://www.uniprot.org/uniprot/	Elongation factor Tu	This protein promotes the GTP-dependent binding of aminoacyl-tRNA to the A-site	Binding to fibronectin	Mycoplasma pneumoniae
326	Q04N79	Q04N79	http://www.uniprot.org/uniprot/Q04N79	http://www.uniprot.org/uniprot/	Elongation factor Tu	This protein promotes the GTP-dependent binding of aminoacyl-tRNA	Surface displayed human complement regulator binding protein	Streptococcus pneumoniae
342	Q74JU6	Q74JU6	http://www.uniprot.org/uniprot/Q74JU6	http://www.uniprot.org/uniprot/	Elongation factor Tu	Elongation factor in protein synthesis	Attachment to human cells and mucin (Binding to intestinal epithelial cells)	Lactobacillus johnsonii
487	C1KZK6	C1KZK6	http://www.uniprot.org/uniprot/C1KZK6	http://www.uniprot.org/uniprot/	Elongation factor Tu	This protein promotes the GTP-dependent binding of aminoacyl-tRNA to the A-site	Binding to plasmin(ogen)	Listeria monocytogenes
488	A8AWA0	A8AWA0	http://www.uniprot.org/uniprot/A8AWA0	http://www.uniprot.org/uniprot/	Elongation factor Tu	This protein promotes the GTP-dependent binding of aminoacyl-tRNA to the A-site	Binding to salivary mucin	Streptococcus gordonii
489	Q88VE0	Q88VE0	http://www.uniprot.org/uniprot/Q88VE0	http://www.uniprot.org/uniprot/	Elongation factor Tu	This protein promotes the GTP-dependent binding of aminoacyl-tRNA to the A-site	Binding to intestinal epithelial cells, competitive exclusion and displacement	Lactobacillus plantarum
628	P64031	P64031	http://www.uniprot.org/uniprot/P64031	http://www.uniprot.org/uniprot/	Elongation factor Tu	This protein promotes the GTP-dependent binding of aminoacyl-tRNA	Inhibits C3 convertase formation and depletes complement	Streptococcus pneumoniae
686	Q02T82	Q02T82	http://www.uniprot.org/uniprot/Q02T82	http://www.uniprot.org/uniprot/	Elongation factor Tu	This protein promotes the GTP-dependent binding of aminoacyl-tRNA	Factor H and plasminogen binding	Pseudonomas aeruginosa
627	Q8DNW9	Q8DNW9	http://www.uniprot.org/uniprot/Q8DNW9	http://www.uniprot.org/uniprot/	Endopeptidase O	Metalloendopeptidase activity	Activates and depletes complement. Inhibits C3 convertase formation.	Streptococcus pneumoniae
613	P11089	P11089	http://www.uniprot.org/uniprot/P11089	http://www.uniprot.org/uniprot/	Flagellar filament 41 kDa core protein	Component of the core of the flagella.	Bound specifically to galactosylceramide	Borrelia burgdorferi
350	Q9URB4	Q9URB4	http://www.uniprot.org/uniprot/Q9URB4	http://www.uniprot.org/uniprot/	Fructose bisphosphate aldolase	Glycolysis, gluconeogenesis	Plasminogen binding	Candida albicans
687	I4E817	I4E817	http://www.uniprot.org/uniprot/I4E817	http://www.uniprot.org/uniprot/	Fructose-1,6-bisphosphate aldolase	Glycolysis	Adhesion to host.	Neisseria meningitidis
502	E9BTJ1	E9BTJ1	http://www.uniprot.org/uniprot/E9BTJ1	http://www.uniprot.org/uniprot/	Fructose-bisphosphate aldolase	D-fructose 1,6-bisphosphate = glycerone phosphate + D-glyceraldehyde 3-phosphate	This enzyme is secreted and imported into the cytoplasm of infected macrophages	Leishmania donovani
554	C1GPZ3	C1GPZ3	http://www.uniprot.org/uniprot/C1GPZ3	http://www.uniprot.org/uniprot/	Fumarase	Catalyze the reversible hydratation of fumarate to malate.	Adhesion to host	Paracoccidioides brasiliensis
631	P27958	P27958	http://www.uniprot.org/uniprot/P27958	http://www.uniprot.org/uniprot/	Genome polyprotein	Core protein packages viral RNA to form a viral nucleocapsid	Also regulates many host cellular functions such as signaling pathways and apoptosis	Hepatitis C virus
x	P9WPW9	P9WPW9	http://www.uniprot.org/uniprot/P9WPW9	http://www.uniprot.org/uniprot/	Glutamate racemase EC:5.1.1.3	It provides D-glutamate, a key building block in the peptidoglycan of the bacteria	Acts as an inhibitor of DNA gyrase	Mycobacterium tuberculosis
305	P50142	P50142	http://www.uniprot.org/uniprot/P50142	http://www.uniprot.org/uniprot/	Heat shock protein 60, mitochondrial	May participate in assembly and/or disassembly of proteins	Adhesin	Histoplasma capsulatum
312	Q4VRV1	Q4VRV1	http://www.uniprot.org/uniprot/Q4VRV1	http://www.uniprot.org/uniprot/	Hexokinase	Fructose and glucose phosphorylating enzyme (Glycolysis)	A haemoglobin-binding protein was found on the parasite’s surface in the flagella	Leishmania donovani
260	Q27718	Q27718	http://www.uniprot.org/uniprot/Q27718	http://www.uniprot.org/uniprot/	Histone H3	Histone	Possible role in host erythrocytes invasion	Plasmodium falciparum
285	D3R759	D3R759	http://www.uniprot.org/uniprot/D3R759	http://www.uniprot.org/uniprot/	HtrA	Serine protease	Involved in nasopharyngeal colonization	Streptococcus pneumoniae
481	Q5HIQ7	Q5HIQ7	http://www.uniprot.org/uniprot/Q5HIQ7	http://www.uniprot.org/uniprot/	Inosine-5'-monophosphate dehydrogenase	Catalyzes the conversion of inosine 5'-phosphate (IMP) to xanthosine 5'-phosphate	Binding to plasmin(ogen)	Staphylococcus aureus
211	Q9I9A9	Q9I9A9	http://www.uniprot.org/uniprot/Q9I9A9	http://www.uniprot.org/uniprot/	Iota-crystallin	Lens crystallin	Cellular retinol-binding protein	Lygodactylus picturatus (Yellow-headed dwarf gecko)
552	C1G3G7	C1G3G7	http://www.uniprot.org/uniprot/C1G3G7	http://www.uniprot.org/uniprot/	Isocitrate lyase	Glyoxylate cycle	Adhesion process (fibronectin and type IV collagen binding)	Paracoccidioides brasiliensis
564	Q4A9M4	Q4A9M4	http://www.uniprot.org/uniprot/Q4A9M4	http://www.uniprot.org/uniprot/	Leucyl aminopeptidase	Aminopeptidase	Binding to plasminogen	Mycoplasma hyopneumoniae
553	C0S9Y0	C0S9Y0	http://www.uniprot.org/uniprot/C0S9Y0	http://www.uniprot.org/uniprot/	Malate synthase	Gklyoxylate cycle	Adhesion process (type I and IV collagen and fibronectin binding)	Paracoccidioides brasiliensis
248	P9WK17	P9WK17	http://www.uniprot.org/uniprot/P9WK17	http://www.uniprot.org/uniprot/	Malate synthase G	Malate synthase activity, Magnesium & Manganesium ion binding	Laminin/fibronectin binding protein	Mycobacterium tuberculosis
95	P59391	P59391	http://www.uniprot.org/uniprot/P59391	http://www.uniprot.org/uniprot/	N-acetyl-gamma-glutamyl-phosphate reductase 1 EC:1.2.1.38	Glycolisis	Binds mucus and Caco-2 cells - Binds human ABO blood group antigens	Lactobacillus plantarum
317	Q2G0U9	Q2G0U9	http://www.uniprot.org/uniprot/Q2G0U9	http://www.uniprot.org/uniprot/	N-acetylmuramoyl-L-alanine amidase sle1	Peptidoglycan hydrolase involved in the splitting of the septum during cell division	Fibronectin binding	Staphylococcus aureus
482	P31306	P31306	http://www.uniprot.org/uniprot/P31306	http://www.uniprot.org/uniprot/	Oligopeptide-binding protein SarA	May be involved in the expression of cell surface properties important for colon	Binding to salivary mucin	Streptococcus gordonii
363	T0BSW2	T0BSW2	http://www.uniprot.org/uniprot/T0BSW2	http://www.uniprot.org/uniprot/	Ornithine carbamoyltransferase	Carbamoyl phosphate + L-ornithine = phosphate + L-citrulline.	Fibronectin binding	Staphylococcus epidermidis
462	Q70YI1	Q70YI1	http://www.uniprot.org/uniprot/Q70YI1	http://www.uniprot.org/uniprot/	Outer membrane protein MIP	Essential virulence factor associated with macrophage infectivity.	PPIase activity. Binds to collagen IV in the extracellular matrix.	Legionella pneumophila
60	D0K1B1	D0K1B1	http://www.uniprot.org/uniprot/D0K1B1	http://www.uniprot.org/uniprot/	Peptidyl Prolyl cis,trans-Isomerase (PPI) EC:5.2.1.8	PPIases accelerate the folding of proteins.	Induces apoptosis of gastric epithelial cells - Activates monocyte IL-6 synthesi	Helicobacter pylori
599	C9WZY8	C9WZY8	http://www.uniprot.org/uniprot/C9WZY8	http://www.uniprot.org/uniprot/	Peroxiredoxin	Peroxiredoxin	Binding to plasminogen.	Neisseria meningitidis
315	A9M4E5	A9M4E5	http://www.uniprot.org/uniprot/A9M4E5	http://www.uniprot.org/uniprot/	Peroxiredoxin 2 family protein/glutaredoxin	Cell redox homeostasis.	Plasminogen binding	Neisseria meningitidis
614	O13289	O13289	http://www.uniprot.org/uniprot/O13289	http://www.uniprot.org/uniprot/	Peroxisomal catalase	Occurs in almost all aerobically respiring organisms and serves to protect cells	Plasminogen binding	Candida albicans
61	Q92448	Q92448	http://www.uniprot.org/uniprot/Q92448	http://www.uniprot.org/uniprot/	Phosphofructokinase EC:2.7.1.11	Conversion of Fructose-6-phosphate to Fructose-1,6-bisphosphate (Glycolysis)	Autophagy peroxisomes / Thyroid hormone binding, NTP synthesis	Pichia pastoris
205	D5H2G7	D5H2G7	http://www.uniprot.org/uniprot/D5H2G7	http://www.uniprot.org/uniprot/	Phosphoglucose isomerase (Glucose-6-phosphate isomerase) EC:5.3.1.9	Glycolisis	Adhesive enzyme onto bacterial surface	Lactobacillus crispatus
83	B2SJM1	B2SJM1	http://www.uniprot.org/uniprot/B2SJM1	http://www.uniprot.org/uniprot/	Phosphoglucose isomerase EC:5.3.1.9	Catalyzes the conversion of glucose-6-phosphate into fructose 6-phosphate	Involved in virulence (mechanism of action has not yet been identified)	Xanthomonas oryzae pv. oryzae
300	P46273	P46273	http://www.uniprot.org/uniprot/P46273	http://www.uniprot.org/uniprot/	Phosphoglycerate kinase	Glycolisis	Plasminogen binding	Candida albicans
364	Q8DQX8	Q8DQX8	http://www.uniprot.org/uniprot/Q8DQX8	http://www.uniprot.org/uniprot/	Phosphoglycerate kinase	ATP + 3-phospho-D-glycerate = ADP + 3-phospho-D-glyceroyl phosphate.	Plasminogen binding and tPA activator.	Streptococcus pneumoniae
365	S8XU00	S8XU00	http://www.uniprot.org/uniprot/S8XU00	http://www.uniprot.org/uniprot/	Phosphoglycerate kinase	ATP + 3-phospho-D-glycerate = ADP + 3-phospho-D-glyceroyl phosphate.	Binding to plasmin(ogen) and binding to actin	Streptococcus agalactiae
476	T1ZTF9	T1ZTF9	http://www.uniprot.org/uniprot/T1ZTF9	http://www.uniprot.org/uniprot/	Phosphoglycerate kinase	ATP + 3-phospho-D-glycerate = ADP + 3-phospho-D-glyceroyl phosphate.	Binding to plasmin(ogen)	Streptococcus anginosus
108	G6C746	G6C746	http://www.uniprot.org/uniprot/G6C746	http://www.uniprot.org/uniprot/	Phosphoglycerate kinase EC:2.7.2.3	It converts 3-phospho-D-glycerate to 3-phospho-D-glyceroyl phosphate	Plasminogen binding protein in oral streptococci	Streptococcus sp. oral
298	A0KGD3	A0KGD3	http://www.uniprot.org/uniprot/A0KGD3	http://www.uniprot.org/uniprot/	Phosphoglycerate kinase EC:2.7.2.3	Glycolisis	Cell surface virulence factor	Aeromonas hydrophila subsp. hydrophila
321	E6KIJ3	E6KIJ3	http://www.uniprot.org/uniprot/E6KIJ3	http://www.uniprot.org/uniprot/	Phosphoglycerate kinase EC:2.7.2.3	Glycolisis	Binding to plasminogen	Streptococcus oralis ATCC 49296
243	E0PZW1	E0PZW1	http://www.uniprot.org/uniprot/E0PZW1	http://www.uniprot.org/uniprot/	Phosphoglycerate mutase	Catalyzes the interconversion of 2-phosphoglycerate and 3-phosphoglycerate	Plasminogen binding protein	Streptococcus sp. oral
367	S3DNJ2	S3DNJ2	http://www.uniprot.org/uniprot/S3DNJ2	http://www.uniprot.org/uniprot/	Phosphoglycerate mutase	ATP + 3-phospho-D-glycerate = ADP + 3-phospho-D-glyceroyl phosphate.	Plasminogen binding	Bifidobacterium longum
368	P82612	P82612	http://www.uniprot.org/uniprot/P82612	http://www.uniprot.org/uniprot/	Phosphoglycerate mutase	Phosphoglyceromutase	Plasminogen binding	Candida albicans
692	B8DW74	B8DW74	http://www.uniprot.org/uniprot/B8DW74	http://www.uniprot.org/uniprot/	Phosphoglycerate mutase	Catalyzes the interconversion of 2-phosphoglycerate and 3-phosphoglycerate.	Plasminogen binding	Bifidobacterium lactis
693	E3ER63	E3ER63	http://www.uniprot.org/uniprot/E3ER63	http://www.uniprot.org/uniprot/	Phosphoglycerate mutase	Catalyzes the interconversion of 2-phosphoglycerate and 3-phosphoglycerate.	Plasminogen binding	Bifidobacterium bifidum
621	Q04IN8	Q04IN8	http://www.uniprot.org/uniprot/Q04IN8	http://www.uniprot.org/uniprot/	Pneumolysin	Sulfhydryl-activated toxin that causes cytolysis by forming pores in cholesterol	Activates complement away from bacterial cells and depletes complement components	Streptococcus pneumoniae
584	P26623	P26623	http://www.uniprot.org/uniprot/P26623	http://www.uniprot.org/uniprot/	PPI (Peptidyl Prolyl cis,trans-Isomerase (PPI) EC:5.2.1.8)	PPIases accelerate the folding of proteins	Is implicated in initiation of chlamydial infection.	Chlamydia trachomatis
601	P0A0W3	P0A0W3	http://www.uniprot.org/uniprot/P0A0W3	http://www.uniprot.org/uniprot/	PPI (Peptidyl Prolyl cis,trans-Isomerase (PPI) EC:5.2.1.8)	PPIases accelerate the folding of proteins	Adhesion to host, unknow receptor.	Neisseria gonorrhoeae
604	Q9ZCX6	Q9ZCX6	http://www.uniprot.org/uniprot/Q9ZCX6	http://www.uniprot.org/uniprot/	PPI (Peptidyl Prolyl cis,trans-Isomerase (PPI) EC:5.2.1.8)	PPIases accelerate the folding of proteins	Adhesion to host, unknow receptor.	Rickettsia prowazekii
609	J1NX65	J1NX65	http://www.uniprot.org/uniprot/J1NX65	http://www.uniprot.org/uniprot/	PPI (Peptidyl Prolyl cis,trans-Isomerase (PPI) EC:5.2.1.8)	PPIases accelerate the folding of proteins	Adhesion to host, unknow receptor.	Streptococcus pneumoniae
498	P67188	P67188	http://www.uniprot.org/uniprot/P67188	http://www.uniprot.org/uniprot/	Probable transcriptional regulatory protein SPy_0316/M5005_Spy0269	A highly conserved, surface-exposed and immunogenic protein of unknown function	Is involved both in bacterial cell division and in adhesion to host cells	Streptococcus pyogenes
493	A8AVC1	A8AVC1	http://www.uniprot.org/uniprot/A8AVC1	http://www.uniprot.org/uniprot/	Protein translocase subunit SecA	Part of the Sec protein translocase complex. Interacts with the SecYEG preprotein	Binding to salivary mucin	Streptococcus gordonii
22	Q745I2	Q745I2	http://www.uniprot.org/uniprot/Q745I2	http://www.uniprot.org/uniprot/	Putative 4-hydroxy-4-methyl-2-oxoglutarate aldolase	Splits the fructose 1,6-bisphosphate, into dihydroxyacetone phosphate & glyceral	M. avium adhesins bind to intestinal mucus aldolase	Mycobacterium avium subsp. paratuberculosis
454	P59206	P59206	http://www.uniprot.org/uniprot/P59206	http://www.uniprot.org/uniprot/	Putative endo-beta-N-acetylglucosaminidase	Plays an important role in cell wall degradation and cell separation	Virulence (colonization of the nasopharynx)	Streptococcus pneumoniae
626	P59206	P59206	http://www.uniprot.org/uniprot/P59206	http://www.uniprot.org/uniprot/	Putative endo-beta-N-acetylglucosaminidase	Plays an important role in cell wall degradation and cell separation	Lytic activity promotes bacterial dispersion which limits complement deposition	Streptococcus pneumoniae
484	A8AWF1	A8AWF1	http://www.uniprot.org/uniprot/A8AWF1	http://www.uniprot.org/uniprot/	Putative pyruvate, phosphate dikinase regulatory protein	Bifunctional serine/threonine kinase and phosphorylase	Binding to salivary mucin	Streptococcus gordonii
483	C6VR77	C6VR77	http://www.uniprot.org/uniprot/C6VR77	http://www.uniprot.org/uniprot/	Pyruvate dehydrogenase	Pyruvate dehydrogenase	Binding to plasmin(ogen)	Lactobacillus plantarum
242	P75391	P75391	http://www.uniprot.org/uniprot/P75391	http://www.uniprot.org/uniprot/	Pyruvate dehydrogenase E1 component subunit beta	Pyruvate dehydrogenase (acetyl-transferring) activity	Fibronectin binding protein.	Mycoplasma pneumoniae
508	Q834N2	Q834N2	http://www.uniprot.org/uniprot/Q834N2	http://www.uniprot.org/uniprot/	Pyruvate formate-lyase 1-activating enzyme	Pyruvate formate lyase	Associated with epithelial cell binding	Enterococcus faecalis
694	Q07637	Q07637	http://www.uniprot.org/uniprot/Q07637	http://www.uniprot.org/uniprot/	Pyruvate kinase	This protein is involved in step 5 of the subpathway that synthesizes pyruvate	Binding to invertase	Lactococcus lactis
189	D2BRB9	D2BRB9	http://www.uniprot.org/uniprot/D2BRB9	http://www.uniprot.org/uniprot/	Pyruvate kinase EC:2.7.1.40	Converts phosphoenolpyruvate (PEP) to pyruvate (glycolysis)	L. lactis cell surface protein that binds to yeast mannan	Lactococcus lactis subsp. lactis
324	Q27088	Q27088	http://www.uniprot.org/uniprot/Q27088	http://www.uniprot.org/uniprot/	Pyruvate:ferredoxin oxidoreductase A	Enzyme oxidative decarboxylation of pyruvate to yield acetyl-coA and CO2	Cell surface adherance proteins	Trichomonas vaginalis
480	Q9Z5C7	Q9Z5C7	http://www.uniprot.org/uniprot/Q9Z5C7	http://www.uniprot.org/uniprot/	Ribonucleoside-diphosphate reductase subunit beta	Ribonucleotide-diphosphate reductase	Binding to plasmin(ogen)	Staphylococcus aureus
592	J0Q2D7	J0Q2D7	http://www.uniprot.org/uniprot/J0Q2D7	http://www.uniprot.org/uniprot/	Serine protease HtrA	Serine protease	Binding to e-cadherin	Helicobacter pylori
610	Q6YBU6	Q6YBU6	http://www.uniprot.org/uniprot/Q6YBU6	http://www.uniprot.org/uniprot/	Serum opacity factor	Opacifies mammalian serum	Fibronectin binding protein. Is a streptococcal virulence factor which binds to high density lipoproteins and disrupts them forming large lipid vesicles	Streptococcus pyogenes
622	P62576	P62576	http://www.uniprot.org/uniprot/P62576	http://www.uniprot.org/uniprot/	Sialidase A	Ganglioside catabolic process	Deglycosylate complement components	Streptococcus pneumoniae
246	P9WGE9	P9WGE9	http://www.uniprot.org/uniprot/P9WGE9	http://www.uniprot.org/uniprot/	Superoxide dismutase [Cu-Zn]	Destroys radicals which are normally produced within the cells and which are toxic	Adhesin, binding to a number of host proteins	Mycobacterium tuberculosis
247	B1A031	B1A031	http://www.uniprot.org/uniprot/B1A031	http://www.uniprot.org/uniprot/	Superoxide dismutase EC:1.15.1.1	Destroys radicals which are normally produced within the cells and which are toxic	Adhesin binding mucus-associated proteins.	Mycobacterium avium subsp. avium
619	O34097	O34097	http://www.uniprot.org/uniprot/O34097	http://www.uniprot.org/uniprot/	Surface protein pspA	N-acetylmuramoyl-L-alanine amidase activity	Inhibition of complement activity in host Inhibits CRP deposition and C3 conversion	Streptococcus pneumoniae
620	Q9FDQ1	Q9FDQ1	http://www.uniprot.org/uniprot/Q9FDQ1	http://www.uniprot.org/uniprot/	Surface protein PspC	N-acetylmuramoyl-L-alanine amidase activity	Inhibition of C3 convertase formation and MAC assembly. Inhibition of complement.	Streptococcus pneumoniae
187	Q6GIL6	Q6GIL6	http://www.uniprot.org/uniprot/Q6GIL6	http://www.uniprot.org/uniprot/	Triose phosphate isomerase EC:5.3.1.1	Catalyzes the reversible interconversion of dihydroxyacetone phosphate	Adhesion to fungal mannans	Staphylococcus aureus subsp. aureus
370	Q96VN5	Q96VN5	http://www.uniprot.org/uniprot/Q96VN5	http://www.uniprot.org/uniprot/	Triosephosphate isomerase	D-glyceraldehyde 3-phosphate = glycerone phosphate.	Adhesin	Paracoccidioides brasiliensis
371	E6J203	E6J203	http://www.uniprot.org/uniprot/E6J203	http://www.uniprot.org/uniprot/	Triosephosphate isomerase	D-glyceraldehyde 3-phosphate = glycerone phosphate.	Plasminogen binding.	Streptococcus anginosus
372	F2QEP1	F2QEP1	http://www.uniprot.org/uniprot/F2QEP1	http://www.uniprot.org/uniprot/	Triosephosphate isomerase	D-glyceraldehyde 3-phosphate = glycerone phosphate.	Plasminogen binding.	Streptococcus oralis
479	Q88YH4	Q88YH4	http://www.uniprot.org/uniprot/Q88YH4	http://www.uniprot.org/uniprot/	Triosephosphate isomerase	D-glyceraldehyde 3-phosphate = glycerone phosphate.	Binding to intestinal epithelial cells, competitive exclusion and displacement	Lactobacillus plantarum
71	A7L763	A7L763	http://www.uniprot.org/uniprot/A7L763	http://www.uniprot.org/uniprot/	Tuf (Translation elongation factor Tu)	Translation elongation factor (proteins used in protein synthesis in the cell)	Factor H (Binding to plasma Factor H and Factor H-related protein 1 (FHR-1)	Pseudomonas aeruginosa
122	P12063	P12063	http://www.uniprot.org/uniprot/P12063	http://www.uniprot.org/uniprot/	Tyrosyl tRNA synthetase EC:6.1.1.1	Tyrosyl tRNA synthetase	Promotes folding of group I introns	Neurospora crassa
70	Q92353	Q92353	http://www.uniprot.org/uniprot/Q92353	http://www.uniprot.org/uniprot/	Ubp6 - Ubiquitin carboxyl-terminal hydrolase 6	Deubiquitinating cysteine protease	Proteasome-inhibitory activity	Schizosaccharomyces pombe
478	T1ZWD5	T1ZWD5	http://www.uniprot.org/uniprot/T1ZWD5	http://www.uniprot.org/uniprot/	3-bisphosphoglycerate-dependent phosphoglycerate mutase	Catalyzes the interconversion of 2-phosphoglycerate and 3-phosphoglycerate	Binding to plasmin(ogen)	Streptococcus anginosus
477	F2QC85	F2QC85	http://www.uniprot.org/uniprot/F2QC85	http://www.uniprot.org/uniprot/	2,3-bisphosphoglycerate-dependent phosphoglycerate mutase	Catalyzes the interconversion of 2-phosphoglycerate and 3-phosphoglycerate	Binding to plasmin(ogen)	Streptococcus oralis
501	Q4Q090	Q4Q090	http://www.uniprot.org/uniprot/Q4Q090	http://www.uniprot.org/uniprot/	2,3-bisphosphoglycerate-independent phosphoglycerate mutase	Phosphoglycerate mutase activity	Heparin-binding protein	Leishmania spp.
301	Q9KKF0	Q9KKF0	http://www.uniprot.org/uniprot/Q9KKF0	http://www.uniprot.org/uniprot/	60 kDa chaperonin	Prevents misfolding and promotes the refolding and proper assembly of unfolded proteins	Adhesin	Clostridium difficile
304	P31294	P31294	http://www.uniprot.org/uniprot/P31294	http://www.uniprot.org/uniprot/	60 kDa chaperonin	Prevents misfolding and promotes the refolding and proper assembly of unfolded proteins	Adhesion to glycosphinngolipids. Adhesin.	Haemophilus ducreyi
308	Q9KJ23	Q9KJ23	http://www.uniprot.org/uniprot/Q9KJ23	http://www.uniprot.org/uniprot/	60 kDa chaperonin	Prevents misfolding and promotes the refolding and proper assembly of unfolded proteins	Adhesin, binds to mucins and epithelial cells	Lactobacillus johnsonii
309	P37282	P37282	http://www.uniprot.org/uniprot/P37282	http://www.uniprot.org/uniprot/	60 kDa chaperonin	Prevents misfolding and promotes the refolding and proper assembly of unfolded proteins	Binding to invertase, a Hyperglycosylated mannoprotein from Saccharomyces cerevisiae	Lactococcus lactis
311	Q5ZXP3	Q5ZXP3	http://www.uniprot.org/uniprot/Q5ZXP3	http://www.uniprot.org/uniprot/	60 kDa chaperonin	Prevents misfolding and promotes the refolding and proper assembly of unfolded proteins	Adhesin	Legionella pneumophila
316	H8M3K2	H8M3K2	http://www.uniprot.org/uniprot/H8M3K2	http://www.uniprot.org/uniprot/	60 kDa chaperonin	Prevents misfolding and promotes the refolding and proper assembly of unfolded proteins	Adhesin	Salmonella enterica subsp. enterica serovar Typhimurium str. 798
361	Q8KP52	Q8KP52	http://www.uniprot.org/uniprot/Q8KP52	http://www.uniprot.org/uniprot/	60 kDa chaperonin	Chaperone	Adhesin	Listeria monocytogenes
362	H8EVS5	H8EVS5	http://www.uniprot.org/uniprot/H8EVS5	http://www.uniprot.org/uniprot/	60 kDa chaperonin	Chaperone	Adhesin to CD43 on macrophage surface	Mycobacterium tuberculosis
511	Q93EU6	Q93EU6	http://www.uniprot.org/uniprot/Q93EU6	http://www.uniprot.org/uniprot/	60 kDa chaperonin	Prevents misfolding and promotes the refolding and proper assembly of unfolded proteins	Associated with epithelial cell binding	Enterococcus faecalis
582	P0C923	P0C923	http://www.uniprot.org/uniprot/P0C923	http://www.uniprot.org/uniprot/	60 kDa chaperonin	Chaperone	Bound specifically to galactosylceramide	Borrelia burgdorferi
583	P0CB35	P0CB35	http://www.uniprot.org/uniprot/P0CB35	http://www.uniprot.org/uniprot/	60 kDa chaperonin	Chaperone	Adhesion to host, unknow receptor.	Brucella abortus
595	Q48900	Q48900	http://www.uniprot.org/uniprot/Q48900	http://www.uniprot.org/uniprot/	60 kDa chaperonin	Chaperone	Binding to alpha and beta-3 receptors.	Mycobacterium avium
602	R8AM44	R8AM44	http://www.uniprot.org/uniprot/R8AM44	http://www.uniprot.org/uniprot/	60 kDa chaperonin	Chaperone	Adhesion to host, unknow receptor.	Plesiomonas shigelloides
606	Q8CX00	Q8CX00	http://www.uniprot.org/uniprot/Q8CX00	http://www.uniprot.org/uniprot/	60 kDa chaperonin	Chaperone	Located in the membrane surface. Putative virulence factor.	Streptococcus agalactiae
691	P0A1D3	P0A1D3	http://www.uniprot.org/uniprot/P0A1D3	http://www.uniprot.org/uniprot/	60 kDa chaperonin	Prevents misfolding and promotes the refolding and proper assembly of unfolded proteins	Adhesion to host.	Salmonella typhimurium
566	Q1D3Y5	Q1D3Y5	http://www.uniprot.org/uniprot/Q1D3Y5	http://www.uniprot.org/uniprot/	60 kDa chaperonin 1	Prevents misfolding and promotes the refolding and proper assembly of unfolded proteins	Bactericidal predation	Myxococcus xanthus
567	P9WPE9	P9WPE9	http://www.uniprot.org/uniprot/P9WPE9	http://www.uniprot.org/uniprot/	60 kDa chaperonin 1	Prevents misfolding and promotes the refolding and proper assembly of unfolded proteins	Biofilm formation	Mycobacterium tuberculosis
597	A1KFR2	A1KFR2	http://www.uniprot.org/uniprot/A1KFR2	http://www.uniprot.org/uniprot/	60 kDa chaperonin 1	Chaperone	Adhesion to DC-SIGN	Mycobacterium bovis BCG
58	A0QQU5	A0QQU5	http://www.uniprot.org/uniprot/A0QQU5	http://www.uniprot.org/uniprot/	60 kDa chaperonin 1	Chaperone	Essential for biofilm formation	Mycobacterium smegmatis
585	Q9Z7C9	Q9Z7C9	http://www.uniprot.org/uniprot/Q9Z7C9	http://www.uniprot.org/uniprot/	60 kDa chaperonin 2	Chaperone	Implicated in initiation of chlamydial infection.	Chlamydia trachomatis
56	P09239	P09239	http://www.uniprot.org/uniprot/P09239	http://www.uniprot.org/uniprot/	60 kDa chaperonin 2	Chaperone	Inhibits murine experimental asthma (prevents goblet cell hyperplasia and mucin)	Mycobacterium leprae
386	O33983	O33983	http://www.uniprot.org/uniprot/O33983	http://www.uniprot.org/uniprot/	Amidase	Autolysin	Adherence to eukaryotic cells	Listeria monocytogenes
629	A7KT66	A7KT66	http://www.uniprot.org/uniprot/A7KT66	http://www.uniprot.org/uniprot/	Ancillary pilus subunit	Integral component of membrane.	Promote adhesion to and invasion of macrophages	Streptococcus pneumoniae
339	P44324	P44324	http://www.uniprot.org/uniprot/P44324	http://www.uniprot.org/uniprot/	Aspartate ammonia-lyase	L-aspartate = fumarate + NH3	Plasminogen binding	Haemophilus influenzae
283	A7VMH8	A7VMH8	http://www.uniprot.org/uniprot/A7VMH8	http://www.uniprot.org/uniprot/	AtlA (autolysin)	Autolysin	Is a fibronectin-binding protein and contributes to bacterial survival	Streptococcus mutans
340	P0A3J0	P0A3J0	http://www.uniprot.org/uniprot/P0A3J0	http://www.uniprot.org/uniprot/	Chaperone protein DnaK	Acts as a chaperone	Binding to invertase, a mannoprotein of Saccharomyces	Lactococcus lactis
341	Q9JVQ9	Q9JVQ9	http://www.uniprot.org/uniprot/Q9JVQ9	http://www.uniprot.org/uniprot/	Chaperone protein DnaK	Chaperone	Plasminogen binding	Neisseria meningitidis
354	Q8G6W1	Q8G6W1	http://www.uniprot.org/uniprot/Q8G6W1	http://www.uniprot.org/uniprot/	Chaperone protein DnaK	Acts as a chaperone.	Plasminogen binding	Bifidobacterium animalis
355	A9M296	A9M296	http://www.uniprot.org/uniprot/A9M296	http://www.uniprot.org/uniprot/	Chaperone protein DnaK	Acts as a chaperone.	Plasminogen binding	Neisseria meningitidis
581	C6L8D6	C6L8D6	http://www.uniprot.org/uniprot/C6L8D6	http://www.uniprot.org/uniprot/	Chaperone protein DnaK	Chaperone	Adhesion to host, unknow receptor.	Bifidobacterium animalis
586	O87712	O87712	http://www.uniprot.org/uniprot/O87712	http://www.uniprot.org/uniprot/	Chaperone protein DnaK	Chaperone	Adhesion to host, unknow receptor.	Coxiella burnetti
588	B7UI59	B7UI59	http://www.uniprot.org/uniprot/B7UI59	http://www.uniprot.org/uniprot/	Chaperone protein DnaK	Chaperone	Adhesion to Sulphogalacosylceramide.	Escherichia coli O127:H6
589	P43736	P43736	http://www.uniprot.org/uniprot/P43736	http://www.uniprot.org/uniprot/	Chaperone protein DnaK	Chaperone	Adhesion to host, unknow receptor.	Haemophilus influenza
591	P55994	P55994	http://www.uniprot.org/uniprot/P55994	http://www.uniprot.org/uniprot/	Chaperone protein DnaK	Chaperone	Adhesion to sulphatides receptors.	Helicobacter pylori
594	Q5ZTY3	Q5ZTY3	http://www.uniprot.org/uniprot/Q5ZTY3	http://www.uniprot.org/uniprot/	Chaperone protein DnaK	Chaperone	Adhesion to host, unknow receptor.	Legionella pneumophila
596	Q00488	Q00488	http://www.uniprot.org/uniprot/Q00488	http://www.uniprot.org/uniprot/	Chaperone protein DnaK	Chaperone	Adhesion to host, unknow receptor.	Mycobacterium avium
600	Q9K0N4	Q9K0N4	http://www.uniprot.org/uniprot/Q9K0N4	http://www.uniprot.org/uniprot/	Chaperone protein DnaK	Chaperone	Binding to plasminogen.	Neisseria meningitidis
607	P0A3J3	P0A3J3	http://www.uniprot.org/uniprot/P0A3J3	http://www.uniprot.org/uniprot/	Chaperone protein DnaK	Chaperone	Located in the membrane surface. Putative virulence factor.	Streptococcus agalactiae
	P27487	P27487	http://www.uniprot.org/uniprot/P27487	http://www.uniprot.org/uniprot/	CD26/DPP4	Cell surface glycoprotein receptor involved in the costimulatory signal essential for T-cell receptor (TCR)-mediated T-cell activation.	recent bioinformatics insights suggest a potential interaction of SARS-CoV-2 with the «moonlighting protein» CD26/DPP4, exactly how MERS-CoV works	Homo sapiens
	Q92211	Q92211	http://www.uniprot.org/uniprot/Q92211	http://www.uniprot.org/uniprot/	Glyceraldehyde-3-phosphate dehydrogenase	catalysis/glycolysis pathway	ECM-binding, HPG-binding.	Candida albicans
	P30575	P30575	http://www.uniprot.org/uniprot/P30575	http://www.uniprot.org/uniprot/	Enolase - Eno1	catalysis/glycolysis pathway	adhesion to endothelial cells, HPG-binding, interaction with contact system proteins.	Candida albicans
	P82612	P82612	http://www.uniprot.org/uniprot/P82612	http://www.uniprot.org/uniprot/	Gpm1	catalysis/glycolysis pathway	adhesion to endothelial cells and keratinocytes, ECM-binding, HPG-binding, interaction with component of complement system, interaction with contact system proteins, cleavage activity of C3b.	Candida albicans
	P43067	P43067	http://www.uniprot.org/uniprot/P43067	http://www.uniprot.org/uniprot/	Adh1	Catalysis/fermentation	ECM-binding, HPG-binding.	Candida albicans
	Q59W33	Q59W33	http://www.uniprot.org/uniprot/Q59W33	http://www.uniprot.org/uniprot/	Gpd2	catalysis/carbohydratemetabolism	adhesion to endothelial cells and keratinocytes, ECM-binding, HPG-binding, interaction with component of complement system.	Candida albicans
	P41797	P41797	http://www.uniprot.org/uniprot/P41797	http://www.uniprot.org/uniprot/	Ssa1	Chaperonin	induction of endocytosis, Hst5-binding	Candida albicans
	5A0M4	5A0M4	http://www.uniprot.org/uniprot/5A0M4	http://www.uniprot.org/uniprot/	Eft2 (Elongation factor 2)	Preotein synthesis	Interaction with contact system proteins	Candida albicans
	Unknown	Unknown	http://www.uniprot.org/uniprot/Unknown	http://www.uniprot.org/uniprot/	Peptidylarginine deaminases (PADs)	post-translational deimination	citrullination	Sars-Cov-2
	P77872	P77872	http://www.uniprot.org/uniprot/P77872	http://www.uniprot.org/uniprot/	KatA catalase	Catalase	Binding to Vitronectin (is involved in cell adhesion and migration and also regulates the complementsystem. Richter and coworkers)	Helicobacter pylori
	Unknown	Unknown	http://www.uniprot.org/uniprot/Unknown	http://www.uniprot.org/uniprot/	FACIN acetylornithine transaminase	cytosolic enzyme acetylornithine transaminase	complement inhibitor), which binds to C3, resulting in suppression of all complement pathways	Filifactor alocis
	Q68AZ3	Q68AZ3	http://www.uniprot.org/uniprot/Q68AZ3	http://www.uniprot.org/uniprot/	Glyceraldehyde-3-phosphate dehydrogenase	catalysis/glycolysis pathway	bind heme, thus forming a heme reservoir for exchange with other proteins.	Streptococcus gordonii
	P33379	P33379	http://www.uniprot.org/uniprot/P33379	http://www.uniprot.org/uniprot/	Act A - Actin assembly-inducing protein	Actin assembly-inducing protein	ActA was suggested to berequired for epithelial cell invasion, potentially through adhesion to microvillus struc-tures at the apical surfaces of epithelial cells. In addition toinvading host cells, ActA mediatesL. monocytogenesaggregationin vitroas well asbiofilm formation, through ActA-ActA self-interaction. ActA-mediated aggregation was also observedin vivoin a mouse model of intestinal infecti…	Listeria monocytogenes
	Q7BCK4	Q7BCK4	http://www.uniprot.org/uniprot/Q7BCK4	http://www.uniprot.org/uniprot/	Outer membrane protein IcsA autotransporter	autotransporter	It functions as a polar adhesin and promotes invasion upon exposure to bile salts.	Shigella flexneri
	B1HEZ6	B1HEZ6	http://www.uniprot.org/uniprot/B1HEZ6	http://www.uniprot.org/uniprot/	BimA - Riboflavin biosynthesis protein	Riboflavin biosynthesis protein	It facilitates actin nucleation and elongation by mimickingthe nucleation activity of host cell Ena/VASP proteins	Burkholderia pseudomallei
	A0A4E0QF35	A0A4E0QF35	http://www.uniprot.org/uniprot/A0A4E0QF35	http://www.uniprot.org/uniprot/	Glyceraldehyde-3-phosphate dehydrogenase EC:1.2.1.12	Conversion of D-glyceraldehyde 3-phosphate (G3P) into 3-phospho-D-glyceroyl phosphate (Glycolysis)	Binding to host proteins: Fibrinogen, Fibronectin, Plasminogen.	Francisella tularensis
	A0A0B8RGN3	A0A0B8RGN3	http://www.uniprot.org/uniprot/A0A0B8RGN3	http://www.uniprot.org/uniprot/	Glyceraldehyde-3-phosphate dehydrogenase EC:1.2.1.12		Binding to host protein Rab5a	Listeria monocytogenes
	A0A045ITJ4	A0A045ITJ4	http://www.uniprot.org/uniprot/A0A045ITJ4	http://www.uniprot.org/uniprot/	Glyceraldehyde-3-phosphate dehydrogenase EC:1.2.1.12		Binding to host proteins Lactoferrin Transferrin	Mycobacterium tuberculosis
	A0A449A0N3	A0A449A0N3	http://www.uniprot.org/uniprot/A0A449A0N3	http://www.uniprot.org/uniprot/	Glyceraldehyde-3-phosphate dehydrogenase EC:1.2.1.12		Binding to host protein: Fibrinogen, Lactoferrin, Laminin, Vitronectin, Fibronectin.	Mycoplasma pneumoniae
	P99136	P99136	http://www.uniprot.org/uniprot/P99136	http://www.uniprot.org/uniprot/	Glyceraldehyde-3-phosphate dehydrogenase EC:1.2.1.12		Binding to host proteins: Plasminogen, Fibrinogen, Vitronectin, Transferrin.	Staphylococcus aureus
	Q8DXS8	Q8DXS8	http://www.uniprot.org/uniprot/Q8DXS8	http://www.uniprot.org/uniprot/	Glyceraldehyde-3-phosphate dehydrogenase EC:1.2.1.12		Binding to host proteins: Fibrinogen, Laminin, Mucin, Plasminogen, Transferrin	Streptococcus agalactiae
	Q1J8I3	Q1J8I3	http://www.uniprot.org/uniprot/Q1J8I3	http://www.uniprot.org/uniprot/	Glyceraldehyde-3-phosphate dehydrogenase EC:1.2.1.12		Binding to host proteins: C5a anaphylatoxin, Actin, Fibronectin, Lysozyme, Myosin, Plasminogen/Plasmin.	Streptococcus pyogenes
	Q9AJT8	Q9AJT8	http://www.uniprot.org/uniprot/Q9AJT8	http://www.uniprot.org/uniprot/	Glyceraldehyde-3-phosphate dehydrogenase EC:1.2.1.12		Binding to host proteins: C1q protein, Hemoglobin, Heme, Plasminogen/Plasmin.	Streptococcus pneumoniae
	A0A081H5Y7	A0A081H5Y7	http://www.uniprot.org/uniprot/A0A081H5Y7	http://www.uniprot.org/uniprot/	Translation Elongation factor TUF	Elongation factor	plasminogen-binding protein that is exposed on the outer surface of A. baumannii	Acinetobacter baumannii
	I4E817	I4E817	http://www.uniprot.org/uniprot/I4E817	http://www.uniprot.org/uniprot/	Fructose-1,6-bisphosphate aldolase	Glycolysis	It binds human plasminogen via its C-terminal lysine residue.	Neisseria meningitidis
	A0A5K1KQH3	A0A5K1KQH3	http://www.uniprot.org/uniprot/A0A5K1KQH3	http://www.uniprot.org/uniprot/	NagZ - Beta-hexosaminidase	Plays a role in peptidoglycan recycling by cleaving the terminal beta-1,4-linked N-acetylglucosamine (GlcNAc) from peptide-linked peptidoglycan fragments, giving rise to free GlcNAc, anhydro-N-acetylmuramic acid and anhydro-N-acetylmuramic acid-linked peptides	nagZ Triggers Gonococcal Biofilm Disassembly.	Neisseria gonorrhoeae
	P77872	P77872	http://www.uniprot.org/uniprot/P77872	http://www.uniprot.org/uniprot/	Catalase KatA	Decomposes hydrogen peroxide into water and oxygen; serves to protect cells from the toxic effects of hydrogen peroxide.	Catalase KatA is a major Vitronectin-binding protein. KatA protected H. pylori from complement-mediated killing in a Vn-dependent manner. Taken together, the virulence factor KatA is a Vn-binding protein that moonlights on the surface of H. pylori to promote bacterial evasion of host innate immunity.	Helicobacter pylori
