# Supplementary material for: Pathogen Moonlighting Proteins: From Ancestral Key Metabolic Enzymes to Virulence Factors
Source: Microorganisms. 2021 Jun 15;9(6):1300. doi: 10.3390/microorganisms9061300 (PMC8232316; doi:10.3390/microorganisms9061300)
Supplement: Supplementary file 1 [file microorganisms-09-01300-s001.zip › Supplementary Information S5.xlsx]

## Sheet: By microorganism
Organism	Uni Prot	Protein Name	Canonical Function	Moonlighting Function			Pathogenic	Non-Pathogenic	Oportunistic or comensal
Aeromonas hydrophila	Q8GE63	Enolase EC:4.2.1.11	Conversion of 2-phosphoglycerate to phosphoenolpyruvate (Glycolysis)	Plasminogen binding
Aeromonas hydrophila subsp. Hydrophila	A0KGD3	Phosphoglycerate kinase EC:2.7.2.3	It converts 3-phospho-D-glycerate to 3-phospho-D-glyceroyl phosphate (glycolysis).	Cell surface virulence factor.
Bacillus anthracis	A0A0J1HQ93	Glyceraldehyde-3-phosphate dehydrogenase EC:1.2.1.17	Conversion of D-glyceraldehyde 3-phosphate (G3P) into 3-phospho-D-glyceroyl phosphate (Glycolysis)	Plasminogen binding
Bacillus anthracis	C3LDI0	Enolase EC:4.2.1.11	Conversion of 2-phosphoglycerate to phosphoenolpyruvate (Glycolysis)	Plasminogen binding
Bacillus anthracis	Q81UL6	Glyceraldehyde-3-phosphate dehydrogenase EC:1.2.1.12	Conversion of D-glyceraldehyde 3-phosphate (G3P) into 3-phospho-D-glyceroyl phosphate (Glycolysis)	Plasminogen binding
Bifidobacterium animalis	C6L8D6	Chaperone protein DnaK	Chaperone	Adhesion to host, unknow receptor.
Bifidobacterium animalis	Q8G6W1	Chaperone protein DnaK	Acts as a chaperone.	Plasminogen binding
Bifidobacterium animalis subsp. Lactis	D3R5K8	Enolase EC:4.2.1.11	Conversion of 2-phosphoglycerate to phosphoenolpyruvate (Glycolysis)	Plasminogen binding
Bifidobacterium bifidum	A0A0H2Q1X0	Glutamine synthetase	ATP + L-glutamate + NH3 = ADP + phosphate + L-glutamine.	Plasminogen binding
Bifidobacterium bifidum	E3ER63	Phosphoglycerate mutase	Catalyzes the interconversion of 2-phosphoglycerate and 3-phosphoglycerate.	Plasminogen binding
Bifidobacterium bifidum	I3WHD5	Enolase	Catalyzes the reversible conversion of 2-phosphoglycerate into phosphoenolpyruvate. It is essential for the degradation of carbohydrates via glycolysis.	Binding to plasmin(ogen)
Bifidobacterium breve	F9XY86	Enolase	Catalyzes the reversible conversion of 2-phosphoglycerate into phosphoenolpyruvate. It is essential for the degradation of carbohydrates via glycolysis.	Binding to plasmin(ogen)
Bifidobacterium lactis	A0A315RZY3	Glutamine Synthetase	Glutamine Synthetase	Plasminogen binding
Bifidobacterium lactis	B8DW74	Phosphoglycerate mutase	Catalyzes the interconversion of 2-phosphoglycerate and 3-phosphoglycerate.	Plasminogen binding
Bifidobacterium lactis	Q9KK62	Bile salt hydrolase	Choloylglycine hydrolase activity	Plasminogen binding
Bifidobacterium longum	B3DSV2	Enolase	Catalyzes the reversible conversion of 2-phosphoglycerate into phosphoenolpyruvate. It is essential for the degradation of carbohydrates via glycolysis.	Binding to plasmin(ogen)
Bifidobacterium longum	C2GUH0	Glutamine synthetase	ATP + L-glutamate + NH3 = ADP + phosphate + L-glutamine.	Plasminogen binding
Bifidobacterium longum	Q8G5N9	Phosphoglycerate mutase	ATP + 3-phospho-D-glycerate = ADP + 3-phospho-D-glyceroyl phosphate.	Plasminogen binding
Borrelia burgdorferi	O51312	Enolase EC:4.2.1.11	Conversion of 2-phosphoglycerate to phosphoenolpyruvate (Glycolysis)	Binding to plasminogen.
Borrelia burgdorferi	P0C923	60 kDa chaperonin	Chaperone	Bound specifically to galactosylceramide
Borrelia burgdorferi	P11089	Flagellar filament 41 kDa core protein	Component of the core of the flagella.	Bound specifically to galactosylceramide
Brucella abortus	P0CB35	60 kDa chaperonin	Chaperone	Adhesion to host, unknow receptor.
Candida albicans	O13289	Peroxisomal catalase	Occurs in almost all aerobically respiring organisms and serves to protect cells from the toxic effects of hydrogen peroxide. Required for hyphal growth.	Plasminogen binding
Candida albicans	P0CY35	Elongation factor 1-alpha 1	This protein promotes the GTP-dependent binding of aminoacyl-tRNA to the A-site of ribosomes during protein biosynthesis.	Plasminogen binding.
Candida albicans	P30575	Enolase	Glycolysis	Plasminogen binding
Candida albicans	P43067	Alcohol dehydrogenase 1	An alcohol + NAD+ = an aldehyde or ketone + NADH	Plasminogen binding (humans plasminogen)
Candida albicans	P46273	Phosphoglycerate kinase	It converts 3-phospho-D-glycerate to 3-phospho-D-glyceroyl phosphate (glycolysis)	Plasminogen binding
Candida albicans	P82612	Phosphoglycerate mutase	Phosphoglyceromutase	Plasminogen binding
Candida albicans	Q92211	Glyceraldehyde-3-phosphate dehydrogenase	Glycolisis	Adhesion and invasion processes (fribronectin, laminin and type I collagen binding)
Candida albicans	Q9URB4	Fructose bisphosphate aldolase	Glycolysis, gluconeogenesis	Plasminogen binding
Chlamydia trachomatis	P26623	PPI (Peptidyl Prolyl cis,trans-Isomerase (PPI) EC:5.2.1.8)	PPIases accelerate the folding of proteins. It catalyzes the cis-trans isomerization of proline imidic peptide bonds in oligopeptides.	Is implicated in initiation of chlamydial infection.
Chlamydia trachomatis	Q9Z7C9	60 kDa chaperonin 2	Chaperone	Implicated in initiation of chlamydial infection.
Clostridium difficile	Q9KKF0	60 kDa chaperonin	Prevents misfolding and promotes the refolding and proper assembly of unfolded polypeptides generated under stress conditions.	Adhesin.
Coxiella burnetii	O87712	Chaperone protein DnaK	Chaperone	Adhesion to host, unknow receptor.
Echinococcus multilocularis	A7LKP5	Glucose-6-phosphate isomerase	Catalyzes the conversion of glucose-6-phosphate into fructose 6-phosphate (glycolysis)	In the vesicle fluid seems to be related to cellular proliferation and/or differentiation of the germinal layer-associated tissue. "It is able to stimulate division of endothelial cells in vitro. It is hypothesized that PGI could promote angiogenesis around the metacestode in vivo, similarly to what it does around tumour cells"
Echinococcus multilocularis (E. granulosus)	Q9GP32	Aldolase EC:4.1.2.13	Splits the fructose 1,6-bisphosphate, into dihydroxyacetone phosphate & glyceraldehyde 3-phosphate (Glycolysis)	It is exposed in the host–parasite interface: involvement in molecular signaling pathways important for parasite survival & development
Enteamoeba histolytica	Q24803	Alcohol dehydrogenase (EhADH2)	Alcohol dehydrogenase	Binds fibronectin, laminin and type II collagen
Enterococcus faecalis	C7VDQ3	Glyceraldehyde-3-phosphate dehydrogenase EC:1.2.1.12	Conversion of D-glyceraldehyde 3-phosphate (G3P) into 3-phospho-D-glyceroyl phosphate (Glycolysis)	Associated with epithelial cell binding
Enterococcus faecalis	P0DM31	Enolase	Catalyzes the reversible conversion of 2-phosphoglycerate into phosphoenolpyruvate. It is essential for the degradation of carbohydrates via glycolysis.	Associated with epithelial cell binding
Enterococcus faecalis	Q834N2	Pyruvate formate-lyase 1-activating enzyme	Pyruvate formate lyase	Associated with epithelial cell binding
Enterococcus faecalis	Q93EU6	60 kDa chaperonin	Prevents misfolding and promotes the refolding and proper assembly of unfolded polypeptides generated under stress conditions.	Associated with epithelial cell binding
Erysipelothrix rhusiopathiae	W8S2K4	Glyceraldehyde-3-phosphate dehydrogenase	Glycolisis	Adhesin. Binding to fibronectin and plasminogen.
Escherichia coli	C8UPL3	Glyceraldehyde-3-phosphate dehydrogenase EC:1.2.1.12	Conversion of D-glyceraldehyde 3-phosphate (G3P) into 3-phospho-D-glyceroyl phosphate (Glycolysis)	Bind plasminogen and fibrinogen - NAD-ribosylating activity. Binding to intestinal epithelial cells
Escherichia coli O127:H6	B7UI59	Chaperone protein DnaK	Chaperone	Adhesion to Sulphogalacosylceramide.
Haemophilus ducreyi	P31294	60 kDa chaperonin	Prevents misfolding and promotes the refolding and proper assembly of unfolded polypeptides generated under stress conditions.	Adhesion to glycosphinngolipids. Adhesin.
Haemophilus influenzae	P43736	Chaperone protein DnaK	Chaperone	Adhesion to host, unknow receptor.
Haemophilus influenzae	P44324	Aspartate ammonia-lyase	L-aspartate = fumarate + NH3	Plasminogen binding
Helicobacter pylori	C7C076	ATP-dependent protease subunit HslV	Chaperone	Adhesion to host, unknow receptor.
Helicobacter pylori	D0K1B1	Peptidyl Prolyl cis,trans-Isomerase (PPI) EC:5.2.1.8	PPIases accelerate the folding of proteins. It catalyzes the cis-trans isomerization of proline imidic peptide bonds in oligopeptides.	Induces apoptosis of gastric epithelial cells - Activates monocyte IL-6 synthesis
Helicobacter pylori	J0Q2D7	Serine protease HtrA	Serine protease	Binding to e-cadherin
Helicobacter pylori	P55994	Chaperone protein DnaK	Chaperone	Adhesion to sulphatides receptors.
Hepatitis C virus	P27958	Genome polyprotein	Core protein packages viral RNA to form a viral nucleocapsid, and promotes virion budding. Modulates viral translation initiation by interacting with HCV IRES and 40S ribosomal subunit.	Also regulates many host cellular functions such as signaling pathways and apoptosis.
Histoplasma capsulatum	A6R3K7	PPI (Peptidyl Prolyl cis,trans-Isomerase (PPI) EC:5.2.1.8)	PPIases accelerate the folding of proteins. It catalyzes the cis-trans isomerization of proline imidic peptide bonds in oligopeptides.	Binding to VLA5
Histoplasma capsulatum	P50142	Heat shock protein 60, mitochondrial	May participate in assembly and/or disassembly of proteins imported into the mitochondrion. HSP60 are ATPases and have affinity for unfolded proteins.	Adhesin
Homo sapiens	P00558	Phosphoglycerate kinase EC:2.7.2.3	It converts 3-phospho-D-glycerate to 3-phospho-D-glyceroyl phosphate (glycolysis)	Plasmin reductase
Homo sapiens	P06733	Alpha-enolase	Glycolysis	"Growth control, hypoxia tolerance and allergic responses. May also function in the intravascular and pericellular fibrinolytic system due to its ability to serve as a receptor and activator of plasminogen on the cell surface of several cell-types such as leukocytes and neurons. Stimulates immunoglobulin production. MBP1 binds to the myc promoter and acts as a transcriptional repressor. May be a …
Homo sapiens	P07996	Thrombospondin 1	Adhesive glycoprotein that mediates cell-to-cell and cell-to-matrix interactions. Binds heparin.	1-TSP promotes replication,2-it modifies smooth muscle cell responses to contractile agents,3-TSP is involved in processes important to tissue remodeling,4-it promotes activation of the latent forms of transforming growth factors (L-TGFs)-beta
Homo sapiens	P27487	CD26/DPPIV	Cell surface glycoprotein receptor involved in the costimulatory signal essential for T-cell receptor (TCR)-mediated T-cell activation	The protein functions as (1) serine protease, (2) receptor, (3) costimulatory protein, (4) adhesion molecule for collagen and fibronectin, and (5) is involved in apoptosis
Homo sapiens	P60709	Actin	Cytoskeletal	Interaction with histone acetylase complex. Frequent contaminant of the cytoskeletal. Enforced moonlighting function of actin: Shigella recruits actin into comet-shaped tails that allow movement within the cytoplasm and invasion of neighboring cells. vascular endothelial growth factor receptor signaling pathway
Lactobacillus casei	A0A0K1MVR4	Class A sortase	Integral component of membrane.	Inhibit the internalization of S. aureus, a major etiologic agent of mastitis, into bovine mammary epithelial cells. Fibronectin binding protein.
Lactobacillus crispatus	D5GYN9	Glutamine Synthetase	Synthesis of Glutamine	Binding to plasmin(ogen); Binding to collagen I and laminin & Binding to other bacterial species
Lactobacillus crispatus	D5H2B9	Glyceraldehyde-3-phosphate dehydrogenase EC:1.2.1.12	Conversion of D-glyceraldehyde 3-phosphate (G3P) into 3-phospho-D-glyceroyl phosphate (Glycolysis)	Binding to Plasminogen
Lactobacillus crispatus	D5H2G7	Phosphoglucose isomerase (Glucose-6-phosphate isomerase) EC:5.3.1.9	Catalyzes the conversion of glucose-6-phosphate into fructose 6-phosphate (glycolysis)	Adhesive enzyme onto bacterial surface
Lactobacillus crispatus	Q5K117	Enolase EC: 4.2.1.11.	Catalyzes the reversible conversion of 2-phosphoglycerate into phosphoenolpyruvate. It is essential for the degradation of carbohydrates via glycolysis.	Plasminogen and laminin binding
Lactobacillus gasseri	Q043Z5	Enolase	Catalyzes the reversible conversion of 2-phosphoglycerate into phosphoenolpyruvate. It is essential for the degradation of carbohydrates via glycolysis.	Adhesion to host.
Lactobacillus johnsonii	D6S5V6	Enolase EC:4.2.1.11	Conversion of 2-phosphoglycerate to phosphoenolpyruvate (Glycolysis)	Inhibitor of Neisseria binding. Plasminogen and laminin binding. Binding to laminin.
Lactobacillus johnsonii	Q74JU6	Elongation factor Tu	Elongation factor in protein synthesis	Attachment to human cells and mucin (Binding to intestinal epithelial cells and HT-MTX-derived mucus)
Lactobacillus johnsonii	Q9KJ23	60 kDa chaperonin	Prevents misfolding and promotes the refolding and proper assembly of unfolded polypeptides generated under stress conditions.	Adhesin, binds to mucins and epithelial cells
Lactobacillus plantarum	P56512	Pyruvate dehydrogenase	Pyruvate dehydrogenase	Binding to plasmin(ogen)
Lactobacillus plantarum	P59391	N-acetyl-gamma-glutamyl-phosphate reductase 1 EC:1.2.1.38	Catalyzes the conversion of N-acetyl-L-glutamate to N-acetyl-L-glutamate 5-phosphate.	Binds mucus and Caco-2 cells - Binds human ABO blood group antigens
Lactobacillus plantarum	Q5NJY7	Enolase EC:4.2.1.11	Conversion of 2-phosphoglycerate to phosphoenolpyruvate (Glycolysis)	Fibronectin binding. Binding to plasminogen. Binding to intestinal epithelial cells
Lactobacillus plantarum	Q88VE0	Elongation factor Tu	This protein promotes the GTP-dependent binding of aminoacyl-tRNA to the A-site of ribosomes during protein biosynthesis.	Binding to intestinal epithelial cells, competitive exclusion and displacement of Clostridium sporogenes and Enterococcus faecalis
Lactobacillus plantarum	Q88YH4	Triosephosphate isomerase	D-glyceraldehyde 3-phosphate = glycerone phosphate.	Binding to intestinal epithelial cells, competitive exclusion and displacement of Clostridium sporogenes and Enterococcus faecalis
Lactobacillus plantarum	Q88YH6	Glyceraldehyde-3-phosphate dehydrogenase EC:1.2.1.12	Conversion of D-glyceraldehyde 3-phosphate (G3P) into 3-phospho-D-glyceroyl phosphate (Glycolysis)	Binding to Plasminogen. Binding to fibronectin. Binding to colonic, porcine or vaginal mucin. Binding to intestinal epithelial cells, competitive exclusion and displacement of Clostridium sporogenes and Enterococcus faecalis. Binding to A and B blood antigens
Lactococcus lactis	P0A3J0	Chaperone protein DnaK	Acts as a chaperone	Binding to invertase, a mannoprotein of Saccharomyces (Mediation of LAB adherence to yeast cells)
Lactococcus lactis	P37282	60 kDa chaperonin	Prevents misfolding and promotes the refolding and proper assembly of unfolded polypeptides generated under stress conditions.	Binding to invertase, a Hyperglycosylated mannoprotein from Saccharomyces cerevisiae
Lactococcus lactis	P52987	Glyceraldehyde-3-phosphate dehydrogenase EC:1.2.1.12	Conversion of D-glyceraldehyde 3-phosphate (G3P) into 3-phospho-D-glyceroyl phosphate (Glycolysis)	Binding to invertase, a mannoprotein of Saccharomyces
Lactococcus lactis	Q07637	Pyruvate kinase	This protein is involved in step 5 of the subpathway that synthesizes pyruvate from D-glyceraldehyde 3-phosphate.	Binding to invertase
Lactococcus lactis subsp. lactis	D2BRB9	Pyruvate kinase EC:2.7.1.40	Converts phosphoenolpyruvate (PEP) to pyruvate (glycolysis)	L. lactis cell surface protein that binds to yeast mannan
Legionella pneumophila	Q5ZTY3	Chaperone protein DnaK	Chaperone	Adhesion to host, unknow receptor.
Legionella pneumophila	Q5ZXP3	60 kDa chaperonin	Prevents misfolding and promotes the refolding and proper assembly of unfolded polypeptides generated under stress conditions.	Adhesin. May play a protective role against the defense mechanisms generated by the infected macrophages.
Legionella pneumophila	Q70YI1	Outer membrane protein MIP	Essential virulence factor associated with macrophage infectivity.	PPIase activity. Binds to collagen IV in the extracellular matrix.
Leishmania donovani	E9BTJ1	Fructose-bisphosphate aldolase	D-fructose 1,6-bisphosphate = glycerone phosphate + D-glyceraldehyde 3-phosphate.	This enzyme is secreted and imported into the cytoplasm of infected macrophages, interacts with the host cell’s protein tyrosine phosphatase SHP-1 and so targets its signalling pathways (The interaction of SHP-1 with ALD could contribute to blocking the capacity of the macrophages to mediate an immune response, thus favouring the survival and replication of the parasites inside the phagolysosome)"
Leishmania donovani	Q4VRV1	Hexokinase	Fructose and glucose phosphorylating enzyme (Glycolysis).	A haemoglobin-binding protein was found on the parasite’s surface in the flagellar pocket (it was the hexokinase); it is possibly needed for endocytosis of the host protein.
Leishmania mexicana	Q3HL75	Enolase EC: 4.2.1.11.	Glycolysis	Plasminogen binding
Leishmania spp.	Q4Q090	2,3-bisphosphoglycerate-independent phosphoglycerate mutase	Phosphoglycerate mutase activity	A heparin-binding motif might be responsible for the interaction with heparin/heparin sulphate at the surface of host cells"
Listeria monocytogenes	A0A1D2ITN5	Glyceraldehyde-3-phosphate dehydrogenase EC:1.2.1.12	Conversion of D-glyceraldehyde 3-phosphate (G3P) into 3-phospho-D-glyceroyl phosphate (Glycolysis)	Binding to Plasminogen
Listeria monocytogenes	C1KVC0	DnaK	Acts as a chaperone.	Binding to plasmin(ogen)
Listeria monocytogenes	C1KY94	Enolase	Catalyzes the reversible conversion of 2-phosphoglycerate into phosphoenolpyruvate. It is essential for the degradation of carbohydrates via glycolysis.	Binding to plasmin(ogen)
Listeria monocytogenes	C1KZK6	Elongation factor Tu	This protein promotes the GTP-dependent binding of aminoacyl-tRNA to the A-site of ribosomes during protein biosynthesis.	Binding to plasmin(ogen)
Listeria monocytogenes	O33983	Amidase	Autolysin	Adherence to eukaryotic cells
Listeria monocytogenes	Q8KP52	60 kDa chaperonin	Chaperone	Adhesin
Listeria monocytogenes	Q6Q3I2	Alcohol acetaldehyde dehydrogenase	Acetaldehyde dehydrogenase (acetylating) activity - alcohol dehydrogenase (NAD) activity	Binding to Caco-2 cells & Binding to eukaryotic Hsp60
Lygodactylus picturatus (Yellow-headed dwarf gecko)	Q9I9A9	Iota-crystallin	Lens crystallin	Cellular retinol-binding protein
Mus musculus	P10922	Histone H1	Histone (Histone H1 protein binds to linker DNA between nucleosomes forming the macromolecular structure known as the chromatin fiber. Histones H1 are necessary for the condensation of nucleosome chains into higher-order structured fibers)	Thyroglobulin receptor
Mycobacterium avium	P94915	Glyceraldehyde-3-phosphate dehydrogenase	Conversion of D-glyceraldehyde 3-phosphate (G3P) into 3-phospho-D-glyceroyl phosphate (Glycolysis)	EGF-receptor
Mycobacterium avium	Q00488	Chaperone protein DnaK	Chaperone	Adhesion to host, unknow receptor.
Mycobacterium avium	Q48900	60 kDa chaperonin	Chaperone	Binding to alpha and beta-3 receptors.
Mycobacterium avium subsp. avium	B1A031	Superoxide dismutase EC:1.15.1.1	Destroys radicals which are normally produced within the cells and which are toxic to biological systems	Adhesin binding mucus-associated proteins. Binding to epithelial cell ldolase, GAPDH and cyclophilin A
Mycobacterium avium subsp. paratuberculosis	Q745I2	Putative 4-hydroxy-4-methyl-2-oxoglutarate aldolase	Splits the fructose 1,6-bisphosphate, into dihydroxyacetone phosphate & glyceraldehyde 3-phosphate (Glycolysis)	M. avium adhesins bind to intestinal mucus aldolase, conceivably facilitating intestinal colonization of the organism
Mycobacterium bovis BCG	A1KFR2	60 kDa chaperonin 1	Chaperone	Adhesion to DC-SIGN
Mycobacterium leprae	P09239	60 kDa chaperonin 2	Chaperone: Prevents misfolding and promotes the refolding and proper assembly of unfolded polypeptides generated under stress conditions	Inhibits murine experimental asthma (prevents goblet cell hyperplasia and mucin)
Mycobacterium tuberculosis	A0A3E0V2F9	60 kDa chaperonin	Chaperone	Adhesin to CD43 on macrophage surface
Mycobacterium tuberculosis	P9WGE9	Superoxide dismutase [Cu-Zn]	Destroys radicals which are normally produced within the cells and which are toxic to biological systems	Adhesin, binding to a number of host moonlighting proteins such as Glyceraldehyde-3-phosphate dehydrogenase and aldolase
Mycobacterium tuberculosis	P9WMJ9	Chaperone protein DnaK	Chaperone: Prevents misfolding and promotes the refolding and proper assembly of unfolded polypeptides generated under stress conditions	Stimulates CD8 lymphocyte chemokine production - Stimulates monocyte chemokine synthesis and dendritic cell maturation by binding CD40 - Binds to HIV coreceptor CCR5 - Competes with HIV for binding to CCR5 - Plasminogen binding protein
Mycobacterium tuberculosis	P9WN39	Glutamine Synthetase	Glutamine synthetase ATP + L-glutamate + NH3 => ADP + phosphate + L-glutamine	Plasminogen and fibronectin binding
Mycobacterium tuberculosis	P9WN83	Glyceraldehyde-3-phosphate dehydrogenase EC:1.2.1.26	Conversion of D-glyceraldehyde 3-phosphate (G3P) into 3-phospho-D-glyceroyl phosphate (Glycolysis)	EGF-receptor
Mycobacterium tuberculosis	P9WNL1	Enolase	Catalyzes the reversible conversion of 2-phosphoglycerate into phosphoenolpyruvate. It is essential for the degradation of carbohydrates via glycolysis.	Binds to plasminogen.
Mycobacterium tuberculosis	P9WP65	3',5'-cyclic adenosine monophosphate phosphodiesterase CpdA	Hydrolyzes cAMP to 5'-AMP. Plays an important regulatory role in modulating the intracellular concentration of cAMP, thereby influencing cAMP-dependent processes. Can also hydrolyze cGMP, p-nitrophenyl phosphate (pNPP), bis-(p-nitrophenyl phosphate) (bis(	Controls cell wall permeability
Mycobacterium tuberculosis	P9WPE7	60 kDa chaperonin 2	Chaperone: Prevents misfolding and promotes the refolding and proper assembly of unfolded polypeptides generated under stress conditions	Activates monocyte cytokine synthesis - Cell surface protein involved in macrophage binding - Cell surface protein binding macrophage CD43
Mycobacterium tuberculosis	P9WPE9	60 kDa chaperonin 1	Prevents misfolding and promotes the refolding and proper assembly of unfolded polypeptides generated under stress conditions.	Biofilm formation Granuloma Formation DNA binding
Mycobacterium tuberculosis	P9WPW9	Glutamate racemase	Glutamate racemase (Provides the (R)-glutamate required for cell wall biosynthesis)	DNA kinase inhibitor
Mycobacterium tuberculosis	P9WQN9	Diacylglycerol acyltransferase/mycolyltransferase Ag85C	he antigen 85 proteins (FbpA, FbpB, FbpC) are responsible for the high affinity of mycobacteria to fibronectin, a large adhesive glycoprotein, which facilitates the attachment of M.tuberculosis to murine alveolar macrophages (AMs). They also help to maintain the integrity of the cell wall by catalyzing the transfer of mycolic acids to cell wall arabinogalactan and through the synthesis of alpha,a…	fibronectin binding.
Mycobacterium tuberculosis	P9WQP1	Diacylglycerol acyltransferase/mycolyltransferase Ag85B	Transferase activity	Fibronectin binding proteins
Mycobacterium tuberculosis	P9WQP3	Diacylglycerol acyltransferase/mycolyltransferase Ag85A	The antigen 85 proteins (FbpA, FbpB, FbpC) are responsible for the high affinity of mycobacteria for fibronectin, a large adhesive glycoprotein, which facilitates the attachment of M.tuberculosis to murine alveolar macrophages (AMs). They also help to maintain the integrity of the cell wall by catalyzing the transfer of mycolic acids to cell wall arabinogalactan, and through the synthesis of alph…	Fibronectin binding.
Mycobacterium tuberculosis	P9WK17	Malate synthase G	Malate synthase activity, Magnesium & Manganesium ion binding	Laminin/fibronectin binding protein
Mycoplasma fermentans	A8VHK4	Enolase (Alpha-enolase) EC:4.2.1.11	Conversion of 2-phosphoglycerate to phosphoenolpyruvate (Glycolysis)	Plasminogen binding
Mycoplasma genitalium	P47543	Glyceraldehyde-3-phosphate dehydrogenase EC:1.2.1.18	Conversion of D-glyceraldehyde 3-phosphate (G3P) into 3-phospho-D-glyceroyl phosphate (Glycolysis)	Mucin binding
Mycoplasma hyopneumoniae	Q4A9M4	Leucyl aminopeptidase	Aminopeptidase	Binding to plasminogen.
Mycoplasma pneumoniae	P23568	Elongation factor Tu	This protein promotes the GTP-dependent binding of aminoacyl-tRNA to the A-site of ribosomes during protein biosynthesis.	Binding to fibronectin
Mycoplasma pneumoniae	P75189	Enolase	Catalyzes the reversible conversion of 2-phosphoglycerate into phosphoenolpyruvate. It is essential for the degradation of carbohydrates via glycolysis.	Binding to plasmin(ogen)
Mycoplasma pneumoniae	P75391	Pyruvate dehydrogenase E1 component subunit beta	Pyruvate dehydrogenase (acetyl-transferring) activity	Fibronectin binding protein. Binding to plasmin(ogen).
Mycoplasma suis	Q05G10	Glyceraldehyde-3-phosphate dehydrogenase EC:1.2.1.12	Conversion of D-glyceraldehyde 3-phosphate (G3P) into 3-phospho-D-glyceroyl phosphate (Glycolysis)	Is involved in the adhesion to erythrocytes.
Myxococcus xanthus	Q1D3Y5	60 kDa chaperonin 1	Prevents misfolding and promotes the refolding and proper assembly of unfolded polypeptides generated under stress conditions.	Bactericidal predation
Neisseria gonorrhoeae	P0A0W3	PPI (Peptidyl Prolyl cis,trans-Isomerase (PPI) EC:5.2.1.8)	PPIases accelerate the folding of proteins. It catalyzes the cis-trans isomerization of proline imidic peptide bonds in oligopeptides.	Adhesion to host, unknow receptor.
Neisseria meningitidis	A0A0G4C1R6	Peroxiredoxin	Peroxiredoxin	Binding to plasminogen.
Neisseria meningitidis	A9M296	Chaperone protein DnaK	Acts as a chaperone.	Plasminogen binding
Neisseria meningitidis	A9M4E5	Peroxiredoxin 2 family protein/glutaredoxin	Cell redox homeostasis.	Plasminogen binding.
Neisseria meningitidis	C6S993	Glyceraldehyde-3-phosphate dehydrogenase	Glycolysis	Adhesion to host.
Neisseria meningitidis	C6SIV9	Aldolase EC:4.1.2.13	Splits the fructose 1,6-bisphosphate, into dihydroxyacetone phosphate & glyceraldehyde 3-phosphate (Glycolysis)	It is a cell surface protein involved in cell adherence
Neisseria meningitidis	C6SKU1	Enolase EC:4.2.1.11	Conversion of 2-phosphoglycerate to phosphoenolpyruvate (Glycolysis)	Plasminogen binding
Neisseria meningitidis	I4E817	Fructose-1,6-bisphosphate aldolase	Glycolysis	Adhesion to host.
Neisseria meningitidis	Q9JVQ9	Chaperone protein DnaK	Chaperone	Plasminogen binding
Neisseria meningitidis	Q9K0N4	Chaperone protein DnaK	Chaperone	Binding to plasminogen.
Neurospora crassa	P12063	Tyrosyl tRNA synthetase EC:6.1.1.1	Tyrosyl tRNA synthetase	Promotes folding of group I introns
Onchocerca volvulus	Q7YZX3	Enolase EC: 4.2.1.11.	Glycolysis	Plasminogen binding
Oral streptococci	A0A1F1EC06	Enolase EC: 4.2.1.11.	Glycolysis	Plasminogen binding
Oryctolagus cuniculus (Rabbit)	P00883	Aldolase EC:4.1.2.13	Splits the fructose 1,6-bisphosphate, into dihydroxyacetone phosphate & glyceraldehyde 3-phosphate (Glycolysis)	Interacts with Wiskott-Aldrich Syndr. Protein (WASP) involved in controlling actin dynamics (Ald. is a known F-actin binding protein). Knockdown of aldolase affected the WASP©\mediated processes of cell migration and spreading
Paenibacillus larvae subsp. larvae	V9W1Z1	Enolase EC:4.2.1.11	Conversion of 2-phosphoglycerate to phosphoenolpyruvate (Glycolysis)	A role in virulence: it could be involved in larval degradation, maybe through plasminogen system
Paracoccidioides brasiliensis	C0S1J2	Enolase EC: 4.2.1.11.	Glycolysis	Fibronectin binding
Paracoccidioides brasiliensis	C0S9Y0	Malate synthase	Gklyoxylate cycle	Adhesion process (type I and IV collagen and fibronectin binding)
Paracoccidioides brasiliensis	C1G3G7	Isocitrate lyase	Glyoxylate cycle	Adhesion process (fibronectin and type IV collagen binding)
Paracoccidioides brasiliensis	C1GPZ3	Fumarase	Catalyze the reversible hydratation of fumarate to malate.	Adhesion to host
Paracoccidioides brasiliensis	Q8X1X3	Glyceraldehyde-3-phosphate dehydrogenase EC:1.2.1.12	Conversion of D-glyceraldehyde 3-phosphate (G3P) into 3-phospho-D-glyceroyl phosphate (Glycolysis)	Binds fibronectin, laminin and type II collagen
Paracoccidioides brasiliensis	Q96UH7	Aldolase	Glycolisis	Plasminogen binding.
Paracoccidioides brasiliensis	Q96VN5	Triosephosphate isomerase	D-glyceraldehyde 3-phosphate = glycerone phosphate.	Adhesin
Pichia pastoris	Q92448	Phosphofructokinase EC:2.7.1.11	Conversion of Fructose-6-phosphate to Fructose-1,6-bisphosphate (Glycolysis)	Autophagy peroxisomes / Thyroid hormone binding, NTP synthesis
Plasmodium berghei	A0A113S8Y8	Enolase	Glycolysis	"A peptide that binds to the surface of the mosquito midgut epithelium and inhibits the invasion of Plasmodium berghei was found to be a mimetope of ENO detected on the surface of ookinetes of P. berghei and P. falciparum, suggesting that this extracellularly exposed glycolytic enzyme has a function in recognizing and binding to an epithelial receptor"
Plasmodium berghei	P49577	Fructose-bisphosphate aldolase 2	D-fructose 1,6-bisphosphate = glycerone phosphate + D-glyceraldehyde 3-phosphate.	Attaches actin filaments to TRAP proteins (transmembrane adhesive proteins of the thrombospondin-related anonymous protein) and transduces the motor force across the surface of the plasmodium
Plasmodium falciparum	Q27718	Histone H3	Histone	Possible role in host erythrocytes invasion
Plasmodium falciparum	Q27727	Enolase EC:4.2.1.11	Conversion of 2-phosphoglycerate to phosphoenolpyruvate (Glycolysis)	It may be involved in a host of other biological functions. I.e., enolase localized on the merozoite surface may be involved in red blood cell invasion; vacuolar enolase may be involved in food vacuole formation &/or development
Plasmodium Vivax	Q968V9	Aldolase EC:4.1.2.13	Splits the fructose 1,6-bisphosphate, into dihydroxyacetone phosphate & glyceraldehyde 3-phosphate (Glycolysis)	Host cell invasive (in toxoplasma & plasmodium aldolase acts as a bridge between F-actin and the cytoplasmic tails of extracellular adhesion molecules and facilitase motility and invasion of host cells)
Plesiomonas shigelloides	R8AM44	60 kDa chaperonin	Chaperone	Adhesion to host, unknow receptor.
Pseudomonas aeruginosa	A7L763	Tuf (Translation elongation factor Tu)	Translation elongation factor (proteins used in protein synthesis in the cell)	Factor H (Binding to plasma Factor H and Factor H-related protein 1 (FHR-1)) and plasminogen binding
Pseudonomas aeruginosa	Q02T82	Elongation factor Tu	This protein promotes the GTP-dependent binding of aminoacyl-tRNA to the A-site of ribosomes during protein biosynthesis.	Factor H and plasminogen binding
Rickettsia prowazekii	Q9ZCX6	PPI (Peptidyl Prolyl cis,trans-Isomerase (PPI) EC:5.2.1.8)	PPIases accelerate the folding of proteins. It catalyzes the cis-trans isomerization of proline imidic peptide bonds in oligopeptides.	Adhesion to host, unknow receptor.
Salmonella typhimurium	P0A1D3	60 kDa chaperonin	Prevents misfolding and promotes the refolding and proper assembly of unfolded polypeptides generated under stress conditions.	Adhesion to host.
Schistosoma bovis	B2LXU3	Glyceraldehyde-3-phosphate dehydrogenase EC:1.2.1.12	Conversion of D-glyceraldehyde 3-phosphate (G3P) into 3-phospho-D-glyceroyl phosphate (Glycolysis)	Binding to plasminogen.
Schizosaccharomyces pombe	Q92353	Ubp6 - Ubiquitin carboxyl-terminal hydrolase 6	Deubiquitinating cysteine protease	Proteasome-inhibitory activity
Staphylococcus aureus	O69174	Enolase EC:4.2.1.11	Conversion of 2-phosphoglycerate to phosphoenolpyruvate (Glycolysis)	Laminin binding protein. Binding to plasmin(ogen).
Staphylococcus aureus	P99136	Glyceraldehyde-3-phosphate dehydrogenase EC:1.2.1.12	Conversion of D-glyceraldehyde 3-phosphate (G3P) into 3-phospho-D-glyceroyl phosphate (Glycolysis)	Transferrin receptor. Binding to Plasminogen.
Staphylococcus aureus	Q2G0U9	N-acetylmuramoyl-L-alanine amidase sle1	Peptidoglycan hydrolase involved in the splitting of the septum during cell division (Autolysin)	Fibronectin binding
Staphylococcus aureus	Q5HIQ7	Inosine-5'-monophosphate dehydrogenase	Catalyzes the conversion of inosine 5'-phosphate (IMP) to xanthosine 5'-phosphate (XMP)	Binding to plasmin(ogen)
Staphylococcus aureus	Q9Z5C7	Ribonucleoside-diphosphate reductase subunit beta	Ribonucleotide-diphosphate reductase	Binding to plasmin(ogen)
Staphylococcus aureus subsp. aureus	Q6GIL6	Triose phosphate isomerase EC:5.3.1.1	Catalyzes the reversible interconversion of dihydroxyacetone phosphate and D-glyceraldehyde 3-phosphate (glycolysis)	Adhesion to fungal mannans
Staphylococcus epidermidis	M1XHM3	Ornithine carbamoyltransferase	Carbamoyl phosphate + L-ornithine = phosphate + L-citrulline.	Fibronectin binding
Staphylococcus epidermidis	Q8CPY5	Glyceraldehyde-3-phosphate dehydrogenase EC:1.2.1.12	Conversion of D-glyceraldehyde 3-phosphate (G3P) into 3-phospho-D-glyceroyl phosphate (Glycolysis)	Plasminogen binding. Transferrin-binding protein.
Steinernema glaseri	B8Q027	Enolase	Glycolysis	"Secreted Enolase has been suggested to suppress the immune response in insects"
Streptococcus agalactiae	P0A3J3	Chaperone protein DnaK	Chaperone	Located in the membrane surface. Putative virulence factor.
Streptococcus agalactiae	Q8CX00	60 kDa chaperonin	Chaperone	Located in the membrane surface. Putative virulence factor.
Streptococcus agalactiae	Q8DXS8	Glyceraldehyde-3-phosphate dehydrogenase EC:1.2.1.12	Conversion of D-glyceraldehyde 3-phosphate (G3P) into 3-phospho-D-glyceroyl phosphate (Glycolysis)	Immunomodulator (is reported to function as a virulence factor with B lymphocyte-modulatory activity, it induces B-cell activation & affects IL10 concentration). Binding to Plasminogen. Binding to actin. Binding to fibrinogen. Binding to other bacterial species.
Streptococcus agalactiae	Q8DXT0	Phosphoglycerate kinase	ATP + 3-phospho-D-glycerate = ADP + 3-phospho-D-glyceroyl phosphate.	Binding to plasmin(ogen) and binding to actin
Streptococcus anginosus	A0A1S1FAM2	Phosphoglycerate kinase	ATP + 3-phospho-D-glycerate = ADP + 3-phospho-D-glyceroyl phosphate.	Binding to plasmin(ogen)
Streptococcus anginosus	E6J203	Triosephosphate isomerase	D-glyceraldehyde 3-phosphate = glycerone phosphate.	Plasminogen binding.
Streptococcus anginosus	Q9XDS7	Enolase	Catalyzes the reversible conversion of 2-phosphoglycerate into phosphoenolpyruvate. It is essential for the degradation of carbohydrates via glycolysis.	Binding to plasmin(ogen)
Streptococcus anginosus	U2XJZ2	Enolase	Catalyzes the reversible conversion of 2-phosphoglycerate into phosphoenolpyruvate. It is essential for the degradation of carbohydrates via glycolysis.	Binding to plasmin(ogen)
Streptococcus anginosus	U2Z425	Glyceraldehyde-3-phosphate dehydrogenase	Conversion of D-glyceraldehyde 3-phosphate (G3P) into 3-phospho-D-glyceroyl phosphate (Glycolysis)	Binding to Plasminogen
Streptococcus anginosus	U2Z6L8	2,3-bisphosphoglycerate-dependent phosphoglycerate mutase	Catalyzes the interconversion of 2-phosphoglycerate and 3-phosphoglycerate	Binding to plasmin(ogen)
Streptococcus dysgalactiae subsp equisimilis	M4ZD78	Enolase	Glycolysis	Plasminogen binding.
Streptococcus equisimilis	Q59906	Glyceraldehyde-3-phosphate dehydrogenase EC:1.2.1.12	Conversion of D-glyceraldehyde 3-phosphate (G3P) into 3-phospho-D-glyceroyl phosphate (Glycolysis)	Plasminogen binding
Streptococcus gordonii	A8AUR6	Elongation factor G	Catalyzes the GTP-dependent ribosomal translocation step during translation elongation. During this step, the ribosome changes from the pre-translocational (PRE) to the post-translocational (POST) state as the newly formed A-site-bound peptidyl-tRNA and P-site-bound deacylated tRNA move to the P and E sites, respectively. Catalyzes the coordinated movement of the two tRNA molecules, the mRNA and …	Adhsein, binds to salivary Mucin MUC7
Streptococcus gordonii	A8AVC1	Protein translocase subunit SecA	Part of the Sec protein translocase complex. Interacts with the SecYEG preprotein conducting channel. Has a central role in coupling the hydrolysis of ATP to the transfer of proteins into and across the cell membrane, serving as an ATP-driven molecular motor driving the stepwise translocation of polypeptide chains across the membrane.	Binding to salivary mucin
Streptococcus gordonii	A8AWA0	Elongation factor Tu	This protein promotes the GTP-dependent binding of aminoacyl-tRNA to the A-site of ribosomes during protein biosynthesis.	Binding to salivary mucin
Streptococcus gordonii	A8AWF1	Putative pyruvate, phosphate dikinase regulatory protein	Bifunctional serine/threonine kinase and phosphorylase involved in the regulation of the pyruvate, phosphate dikinase (PPDK) by catalyzing its phosphorylation/dephosphorylation.	Binding to salivary mucin
Streptococcus gordonii	A8AY46	Enolase EC:4.2.1.11	Conversion of 2-phosphoglycerate to phosphoenolpyruvate (Glycolysis)	Binding to salivary mucin MUC7
Streptococcus gordonii	A8AZI3	DNA-directed RNA polymerase subunit beta	DNA-dependent RNA polymerase catalyzes the transcription of DNA into RNA using the four ribonucleoside triphosphates as substrates.	Binding to salivary mucin
Streptococcus gordonii	P31306	Oligopeptide-binding protein SarA	May be involved in the expression of cell surface properties important for colonization of the human oral cavity. It may also be involved in uptake processes.	Binding to salivary mucin
Streptococcus iniae	T1TFA0	Enolase	Catalyzes the reversible conversion of 2-phosphoglycerate into phosphoenolpyruvate. It is essential for the degradation of carbohydrates via glycolysis.	Adhesion to host. It is an Effective Protective Antigen in Mice.
Streptococcus mutans	A7VMH8	AtlA (autolysin)	Autolysin	is a fibronectin-binding protein and contributes to bacterial survival in the bloodstream and virulence for infective endocarditis
Streptococcus mutans	Q8DTS9	Enolase EC: 4.2.1.11.	Glycolysis	Plasminogen binding. Binding to salivary mucin.
Streptococcus oralis	F2QC85	2,3-bisphosphoglycerate-dependent phosphoglycerate mutase	Catalyzes the interconversion of 2-phosphoglycerate and 3-phosphoglycerate	Binding to plasmin(ogen)
Streptococcus oralis	F2QDA9	Enolase	Catalyzes the reversible conversion of 2-phosphoglycerate into phosphoenolpyruvate. It is essential for the degradation of carbohydrates via glycolysis.	Binding to plasmin(ogen)
Streptococcus oralis	F2QDT8	ATP-dependent 6-phosphofructokinase	Phosphofructokinase	Plasminogen binding
Streptococcus oralis	F2QEP1	Triosephosphate isomerase	D-glyceraldehyde 3-phosphate = glycerone phosphate.	Plasminogen binding.
Streptococcus oralis	F2QGM8	Glyceraldehyde-3-phosphate dehydrogenase EC:1.2.1.12	Conversion of D-glyceraldehyde 3-phosphate (G3P) into 3-phospho-D-glyceroyl phosphate (Glycolysis)	Binds major fimbriae of Porphyromonas gingivalis. Binding to Plasminogen.
Streptococcus oralis ATCC 49296	E6KIJ3	Phosphoglycerate kinase EC:2.7.2.3	It converts 3-phospho-D-glycerate to 3-phospho-D-glyceroyl phosphate (glycolysis)	Binding to plasminogen
Streptococcus pneumoniae	A7KT66	Ancillary pilus subunit	Integral component of membrane.	Promote adhesion to and invasion of macrophages
Streptococcus pneumoniae	B1N649	CbpA	Surface proteins noncovalently bound to the phosphorylcholine moiety of the cell wall of Streptococcus pneumoniae by a conserved choline binding domain	Virulence (colonization of the nasopharynx)
Streptococcus pneumoniae	B2ILT3	Choline binding protein G	Surface proteins noncovalently bound to the phosphorylcholine moiety of the cell wall of Streptococcus pneumoniae by a conserved choline binding domain	Virulence (colonization of the nasopharynx)
Streptococcus pneumoniae	B2INL9	Choline binding protein D	Surface proteins noncovalently bound to the phosphorylcholine moiety of the cell wall of Streptococcus pneumoniae by a conserved choline binding domain	Virulence (colonization of the nasopharynx)
Streptococcus pneumoniae	D3R759	HtrA	Serine protease	Involved in nasopharyngeal colonization
Streptococcus pneumoniae	G6LM38	Choline binding protein E	Surface proteins noncovalently bound to the phosphorylcholine moiety of the cell wall of Streptococcus pneumoniae by a conserved choline binding domain	Virulence (colonization of the nasopharynx)
Streptococcus pneumoniae	J1NX65	PPI (Peptidyl Prolyl cis,trans-Isomerase (PPI) EC:5.2.1.8)	PPIases accelerate the folding of proteins. It catalyzes the cis-trans isomerization of proline imidic peptide bonds in oligopeptides.	Adhesion to host, unknow receptor.
Streptococcus pneumoniae	O34097	Surface protein pspA	N-acetylmuramoyl-L-alanine amidase activity	Inhibition of complement activity in host Inhibits CRP deposition and C3 convertase formation
Streptococcus pneumoniae	P06653	Autolysin, LytA	Autolysins are involved in some important biological processes such as cell separation, cell-wall turnover, competence for genetic transformation, formation of the flagella and sporulation. Autolysin strictly depends on the presence of choline-containing cell walls for activity.	Inhibits C3 convertase formation and reduces opsonization by iC3b
Streptococcus pneumoniae	P49610	Beta-N-acetylhexosaminidase	Hydrolysis of terminal non-reducing N-acetyl-D-hexosamine residues in N-acetyl-beta-D-hexosaminides.	Deglycosylate complement components
Streptococcus pneumoniae	P59206	Putative endo-beta-N-acetylglucosaminidase	Plays an important role in cell wall degradation and cell separation.	Virulence (colonization of the nasopharynx)
Streptococcus pneumoniae	P62576	Sialidase A	Ganglioside catabolic process	Deglycosylate complement components
Streptococcus pneumoniae	P63788	ATP-dependent Clp protease proteolytic subunit	Cleaves peptides in various proteins in a process that requires ATP hydrolysis. Has a chymotrypsin-like activity. Plays a major role in the degradation of misfolded proteins.	Binding of plasmin(ogen) & Binding to fibronectin & Binding and invasion to epithelial and endothelial cells
Streptococcus pneumoniae	P64031	Elongation factor Tu	This protein promotes the GTP-dependent binding of aminoacyl-tRNA to the A-site of ribosomes during protein biosynthesis.	Inhibits C3 convertase formation and depletes complement
Streptococcus pneumoniae	Q04IN8	Pneumolysin	Sulfhydryl-activated toxin that causes cytolysis by forming pores in cholesterol containing host membranes. After binding to target membranes, the protein undergoes a major conformation change, leading to its insertion in the host membrane and formation of an oligomeric pore complex. Cholesterol may be required for binding to host membranes, membrane insertion and pore formation. Can be reversibl…	Activates complement away from bacterial cells and depletes complement components.
Streptococcus pneumoniae	Q04N79	Elongation factor Tu	This protein promotes the GTP-dependent binding of aminoacyl-tRNA to the A-site of ribosomes during protein biosynthesis.	Surface displayed human complement regulator binding protein.
Streptococcus pneumoniae	Q8DNW9	Endopeptidase O	Metalloendopeptidase activity	Activates and depletes complement. Inhibits C3 convertase formation.
Streptococcus pneumoniae	Q8DQX8	Phosphoglycerate kinase	ATP + 3-phospho-D-glycerate = ADP + 3-phospho-D-glyceroyl phosphate.	Plasminogen binding and tPA activator. Inhibits MAC formation and depletes complement.
Streptococcus pneumoniae	Q8DR54	6PGD (6-phosphogluconate dehydrogenase) EC:1.1.1.44	Catalyzes the oxidative decarboxylation of 6-phosphogluconate to ribulose 5-phosphate and CO2	Putative adhesin
Streptococcus pneumoniae	Q97QS2	Enolase EC:4.2.1.11	Conversion of 2-phosphoglycerate to phosphoenolpyruvate (Glycolysis)	Plasminogen binding / plasminogen receptor, heat shock protein, cytoskeletal/chromatin structure binding. Binding to C4b-binding proteins. Inhibits C3 convertase formation and depletes complement.
Streptococcus pneumoniae	Q9AJT5	Glyceraldehyde-3-phosphate dehydrogenase EC:1.2.1.12	Conversion of D-glyceraldehyde 3-phosphate (G3P) into 3-phospho-D-glyceroyl phosphate (Glycolysis)	Plasminogen binding protein / Adhesin for mucin. Activates and depletes complement.
Streptococcus pneumoniae	Q9FDQ1	Surface protein PspC	N-acetylmuramoyl-L-alanine amidase activity	Inhibition of C3 convertase formation and MAC assembly. Inhibition of complement activity in host.
Streptococcus pneumoniae	Q9KGU0	Beta-galactosidase	Beta-galactosidase activity	Deglycosylate complement components
Streptococcus pneumoniae R6	P0A4S2	Aldolase EC:4.1.2.13	Splits the fructose 1,6-bisphosphate, into dihydroxyacetone phosphate & glyceraldehyde 3-phosphate (Glycolysis)	It is a cell surface lectin which binds host cadherin receptor termed flamingo
Streptococcus pyogenes	J7M6M6	Glyceraldehyde-3-phosphate dehydrogenase EC:1.2.1.12	Conversion of D-glyceraldehyde 3-phosphate (G3P) into 3-phospho-D-glyceroyl phosphate (Glycolysis)	Fibronectin binding protein - Plasminogen binding protein - Cell signaling kinase/ADP ribosylase - Neutrophil evasion protein. Binding to urokinase receptor on human pharyngeal cells. Binding to lysozyme. Binding to myosin. Binding to C5a complement protein
Streptococcus pyogenes	P67188	Probable transcriptional regulatory protein SPy_0316/M5005_Spy0269	A highly conserved, surface-exposed and immunogenic protein of unknown function	Is involved both in bacterial cell division and in adhesion to host cells and we propose to rename this multifunctional moonlighting protein as SpyAD (Streptococcus pyogenes Adhesion and Division protein).
Streptococcus pyogenes	P69949	Enolase EC: 4.2.1.11.	Catalyzes the reversible conversion of 2-phosphoglycerate into phosphoenolpyruvate. It is essential for the degradation of carbohydrates via glycolysis.	Plasminogen binding. Binding to albumin.
Streptococcus pyogenes	Q1J8I3	Glyceraldehyde-3-phosphate dehydrogenase EC:1.2.1.19	Conversion of D-glyceraldehyde 3-phosphate (G3P) into 3-phospho-D-glyceroyl phosphate (Glycolysis)	Plasminogen binding
Streptococcus pyogenes	Q6YBU6	Serum opacity factor	Opacifies mammalian serum.	Fibronectin binding protein. Is a streptococcal virulence factor which binds to high density lipoproteins and disrupts them forming large lipid vesicles.
Streptococcus sobrinus	Q845Q5	Enolase	Catalyzes the reversible conversion of 2-phosphoglycerate into phosphoenolpyruvate. It is essential for the degradation of carbohydrates via glycolysis.	Is an immunosuppressive protein
Streptococcus sp. oral	E0PZW1	Phosphoglycerate mutase	Catalyzes the interconversion of 2-phosphoglycerate and 3-phosphoglycerate	Plasminogen binding protein
Streptococcus sp. Oral	G6C746	Phosphoglycerate kinase EC:2.7.2.3	It converts 3-phospho-D-glycerate to 3-phospho-D-glyceroyl phosphate (glycolysis)	Plasminogen binding protein in oral streptococci. In group B streptococci cell surface phosphoglycerate kinase binds to cellular actin and may be involved in cell binding and internalization
Streptococcus suis	A0A126UNJ8	6-phosphogluconate dehydrogenase	Catalyzes the oxidative decarboxylation of 6-phosphogluconate to ribulose 5-phosphate and CO2, with concomitant reduction of NADP to NADPH.	Adhesion to host, unknow receptor.
Streptococcus suis	A4W2T1	Enolase	Catalyzes the reversible conversion of 2-phosphoglycerate into phosphoenolpyruvate. It is essential for the degradation of carbohydrates via glycolysis.	Binding to intestinal epithelial cells
Streptococcus suis	C6GGT7	Enolase EC:4.2.1.11	Conversion of 2-phosphoglycerate to phosphoenolpyruvate (Glycolysis)	Fibronectin binding protein/adhesin
Streptococcus suis	Q3Y454	Glyceraldehyde-3-phosphate dehydrogenase EC:1.2.1.13	Conversion of D-glyceraldehyde 3-phosphate (G3P) into 3-phospho-D-glyceroyl phosphate (Glycolysis)	Plasminogen binding. Binding to albumin. Binding to porcine tracheal rings.
Taenia pisiformis	T1WGD6	Enolase	Glycolisis	Binding to plasminogen.
Toxoplasma gondii	B9PW35	Aldolase EC:4.1.2.13	Splits the fructose 1,6-bisphosphate, into dihydroxyacetone phosphate & glyceraldehyde 3-phosphate (Glycolysis)	It is essential for efficient host cell invasion
Toxoplasma gondii	Q9UAE6	Enolase	2-phospho-D-glycerate = phosphoenolpyruvate + H2O.	Specifically binds to a TTTTCT DNA motif present in the cyst matrix antigen 1 (TgMAG1) gene promoter. Provides a potential lead in the design of drugs against Toxoplasma brain cysts.
Trichomonas vaginalis	A2DHT2	Glyceraldehyde-3-phosphate dehydrogenase EC:1.2.1.12	Conversion of D-glyceraldehyde 3-phosphate (G3P) into 3-phospho-D-glyceroyl phosphate (Glycolysis)	Binds fibronectin and plasminogen and collagen.
Trichomonas vaginalis	Q27088	Pyruvate:ferredoxin oxidoreductase A	Enzyme oxidative decarboxylation of pyruvate to yield acetyl-coA and CO2	Cell surface adherance proteins
Trichomonas vaginalis	Q5EFD8	Enolase EC:4.2.1.11	Conversion of 2-phosphoglycerate to phosphoenolpyruvate (Glycolysis)	Plasminogen binding
Xanthomonas oryzae	Q5H4Y2	Chorismate mutase EC:5.4.99.5	Catalyzes the Claisen rearrangement of chorismate to prephenate	Involved in virulence (not yet defined, it may imply an important role in bacterium-rice interactions)
Xanthomonas oryzae pv. oryzae	B2SJM1	Phosphoglucose isomerase EC:5.3.1.9	Catalyzes the conversion of glucose-6-phosphate into fructose 6-phosphate (glycolysis)	Involved in virulence (mechanism of action has not yet been identified)
