# Supplementary material for: Pathogen Moonlighting Proteins: From Ancestral Key Metabolic Enzymes to Virulence Factors
Source: Microorganisms. 2021 Jun 15;9(6):1300. doi: 10.3390/microorganisms9061300 (PMC8232316; doi:10.3390/microorganisms9061300)
Supplement: Supplementary file 1 [file microorganisms-09-01300-s001.zip › Supplementary Information S7.xlsx]

## Sheet: Hoja1
Motif	Protein	Number of pathogens	Uniprot ID of the proteins	Pathogenic microorganisms
TAVV	Enolasa	16	A0A1F1EC06, A4W2T1, A8AY46, C3LDI0, C6GGT7, F2QDA9, M4ZD78, O69174, P0DM31, P69949, Q845Q5, Q8DTS9, Q97QS2, Q9XDS7, T1TFA0, U2XJZ2	Streptococcus spp, Bacillus anthracis, Staphylococcus aureus, Enterococcus faecalis,
TLTET	Enolasa	21	A0A1F1EC06, A4W2T1, A8AY46, C1KY94, C3LDI0, C6GGT7, F2QDA9, M4ZD78, O51312, O69174, P0DM31, P69949, P75189, P9WNL1, Q845Q5, Q8DTS9, Q97QS2, Q9XDS7, T1TFA0, U2XJZ2, V9W1Z1	Streptococcus spp, Listeria monocytogenes, Bacillus anthracis, Borrelia burgdorferi, Staphylococcus aureus, Enterococcus faecalis, Mycoplasma pneumoniae, Mycobacterium tuberculosis, Paenibacillus larvae
IADI	Enolasa	18	A0A1F1EC06, A4W2T1, A8AY46, C1KY94, C3LDI0, C6GGT7, F2QDA9, M4ZD78, O69174, P69949, Q845Q5, Q8DTS9, Q97QS2, Q9XDS7, T1TFA0, T1WGD6, U2XJZ2, V9W1Z1	Streptococcus spp, Listeria monocytogenes, Bacillus anthracis, Staphylococcus aureus, Paenibacillus larvae
IEDG	Enolasa	22	A0A1F1EC06, A4W2T1, A8AY46, A8VHK4, C1KY94, C3LDI0, C6GGT7, C6SKU1, F2QDA9, M4ZD78, O51312, O69174, P0DM31, P69949, P75189, Q27727, Q845Q5, Q8GE63, Q9XDS7, T1TFA0, U2XJZ2, V9W1Z1	Streptococcus spp, Mycoplasma spp, Listeria monocytogenes, Bacillus anthracis, Neisseria meningitidis, Borrelia burgdorferi, Staphylococcus aureus, Enterococcus faecalis, Plasmodium falciparum, Aeromonas hydrophila, Paenibacillus larvae
MMNI	Enolasa	20	A0A1F1EC06, A4W2T1, A8AY46, C1KY94, C3LDI0, C6GGT7, F2QDA9, M4ZD78, O69174, P0DM31, P69949, P9WNL1, Q845Q5, Q8DTS9, Q8GE63, Q97QS2, Q9XDS7, T1TFA0, U2XJZ2, V9W1Z1	Streptococcus spp, Listeria monocytogenes, Bacillus anthracis, Enterococcus faecalis, Mycobacterium tuberculosis, Aeromonas hydrophila, Paenibacillus larvae
ATNA	Enolasa	17	A0A1F1EC06, A4W2T1, A8AY46, C1KY94, C3LDI0, C6GGT7, F2QDA9, M4ZD78, O69174, P0DM31, P69949, Q845Q5, Q8DTS9, Q97QS2, T1TFA0, U2XJZ2, V9W1Z1	Streptococcus spp , Listeria monocytogenes, Bacillus anthracis, Enterococcus faecalis, Paenibacillus larvae
ESGA	Enolasa	17	A0A1F1EC06, A4W2T1, A8AY46, C3LDI0, C6GGT7, F2QDA9, M4ZD78, O69174, P0DM31, P69949, Q845Q5, Q8DTS9, Q97QS2, Q9XDS7, T1TFA0, U2XJZ2, V9W1Z1	Streptococcus spp , Bacillus anthracis, Enterococcus faecalis, Paenibacillus larvae
FHAL	Enolasa	16	A4W2T1, A8AY46, C3LDI0, C6GGT7, C6SKU1, F2QDA9, M4ZD78, P0DM31, P69949, P75189, Q845Q5, Q8DTS9, Q97QS2, Q9XDS7, T1TFA0, U2XJZ2	Streptococcus spp, Bacillus anthracis, Neisseria meningitidis, Enterococcus faecalis, Mycoplasma pneumoniae
QLLRI	Enolasa	24	A0A1F1EC06, A4W2T1, A8AY46, B8Q027, C1KY94, C3LDI0, C6GGT7, C6SKU1, F2QDA9, M4ZD78, O69174, P0DM31, P69949, P9WNL1, Q27727, Q3HL75, Q845Q5, Q8DTS9, Q97QS2, Q9XDS7, T1TFA0, T1WGD6, U2XJZ2, V9W1Z1	Streptococcus spp, Steinernema glaseri, Listeria monocytogenes, Bacillus anthracis, Neisseria meningitidis, Staphylococcus aureus, Enterococcus faecalis, Mycobacterium tuberculosis, Plasmodium falciparum, Leishmania mexicana, Taenia pisiformis, Paenibacillus larvae
RTDR	Enolasa	20	A0A1F1EC06, A4W2T1, A8AY46, A8VHK40, C1KY94, C3LDI0, C6GGT7, F2QDA9, M4ZD78, O51312, O69174, P0DM31, P69949, Q845Q5, Q8DTS9, Q97QS2, Q9XDS7, T1TFA0, U2XJZ2, V9W1Z1	Streptococcus spp, Mycoplasma fermentans, Listeria monocytogenes, Bacillus anthracis, Borrelia burgdorferi, Staphylococcus aureus, Enterococcus faecalis, Leishmania mexicana, Paenibacillus larvae
YPII	Enolasa	22	A0A113S8Y8, A0A1F1EC06, A4W2T1, A8AY46, A8VHK4, C1KY94, C6GGT7, F2QDA9, M4ZD78, O51312, O69174, P0DM31, P69949, P75189, Q845Q5, Q8DTS9, Q97QS2, Q9UAE6, Q9XDS7, T1TFA0, U2XJZ2, V9W1Z1	Plasmodium spp, Streptococcus spp, Steinernema glaseri, Listeria monocytogenes, Bacillus anthracis, Neisseria meningitidis, Staphylococcus aureus, Enterococcus faecalis, Mycoplasma pneumoniae, Leishmania mexicana, Toxoplasma gondii, Taenia pisiformis, Paenibacillus larvae
GKLD	GAPDH	17	A0A1D2ITN5, C6S993, C7VDQ3, F2QGM8, J7M6M6, P94915, P99136, P9WN83, Q05G10, Q1J8I3, Q3Y454, Q59906, Q8CPY5, Q8DXS8, Q9AJT5, U2Z425, W8S2K4	Listeria monocytogenes, Neisseria meningitidis, Enterococcus faecalis, Streptococcus spp, Mycobacterium spp, Staphylococcus spp, Mycoplasma suis, Erysipelothrix rhusiopathiae
CLAP	GAPDH	19	A0A0J1HQ93, A0A1D2ITN5, B2LXU3, C7VDQ3, C8UPL3, F2QGM8, J7M6M6, P47543, P94915, P9WN83, Q1J8I3, Q3Y454, Q59906, Q8DXS8, Q8X1X3, Q92211, Q9AJT5, U2Z425, W8S2K4	Bacillus anthracis, Listeria monocytogenes, Schistosoma bovis, Enterococcus faecalis, Escherichia coli, Streptococcus spp, Mycoplasma genitalium, Mycobacterium spp, Staphylococcus aureus, Paracoccidioides brasiliensis, Candida albicans, Erysipelothrix rhusiopathiae
GAKK	GAPDH	18	A0A1D2ITN5, A2DHT2, C6S993, C8UPL3, F2QGM8, J7M6M6, P94915, P99136, P9WN83, Q1J8I3, Q3Y454, Q59906, Q8CPY5, Q8DXS8, Q8X1X3, Q92211, Q9AJT5, U2Z425	Listeria monocytogenes, Trichomonas vaginalis, Neisseria meningitidis, Escherichia coli, Streptococcus spp, Mycobacterium spp, Staphylococcus epidermidis, Paracoccidioides brasiliensis, Candida albicans
RAR	GAPDH	19	A0A0J1HQ93, A0A1D2ITN5, A2DHT2, C6S993, C7VDQ3, F2QGM8, J7M6M6, P47543, P94915, P99136, P9WN83, Q05G10, Q1J8I3, Q3Y454, Q59906, Q8CPY5, Q8DXS8, Q9AJT5, U2Z425	Bacillus anthracis, Listeria monocytogenes, Trichomonas vaginalis, Neisseria meningitidis, Enterococcus faecalis, Streptococcus spp, Mycoplasma spp, Mycobacterium spp, Staphylococcus spp,
RVP	GAPDH	24	A0A0J1HQ93, A0A1D2ITN5, A2DHT2, B2LXU3, C6S993, C7VDQ3, C8UPL3, F2QGM8, J7M6M6, P47543, P94915, P99136, P9WN83, Q05G10, Q1J8I3, Q3Y454, Q59906, Q8CPY5, Q8DXS8, Q8X1X3, Q92211, Q9AJT5, U2Z425, W8S2K4	Bacillus anthracis, Listeria monocytogenes, Trichomonas vaginalis, Schistosoma bovis, Neisseria meningitidis, Enterococcus faecalis, Escherichia coli, Streptococcus spp, Mycoplasma spp, Mycobacterium spp, Staphylococcus spp, Paracoccidioides brasiliensis, Candida albicans, Erysipelothrix rhusiopathiae
TGAAKA	GAPDH	21	A0A0J1HQ93, A0A1D2ITN5, B2LXU3, C6S993, C7VDQ3, C8UPL3, F2QGM8, J7M6M6, P47543, P94915, P99136, P9WN83, Q1J8I3, Q3Y454, Q8CPY5, Q8DXS8, Q8X1X3, Q92211, Q9AJT5, U2Z425, W8S2K4	Bacillus anthracis, Listeria monocytogenes, Schistosoma bovis, Neisseria meningitidis, Enterococcus faecalis, Escherichia coli, Streptococcus spp, Mycoplasma genitalium, Mycobacterium spp, Staphylococcus spp, Paracoccidioides brasiliensis, Candida albicans, Erysipelothrix rhusiopathiae
