# Supplementary material for: Pathogen Moonlighting Proteins: From Ancestral Key Metabolic Enzymes to Virulence Factors
Source: Microorganisms. 2021 Jun 15;9(6):1300. doi: 10.3390/microorganisms9061300 (PMC8232316; doi:10.3390/microorganisms9061300)
Supplement: Supplementary file 1 [file microorganisms-09-01300-s001.zip › Supplementary Information S8.xlsx]

## Sheet: Hoja1
	GKLD	CLAP	GAKK	RAR	RVP	TGAAKA
A0A0J1HQ93	NE	155-158	NE	196-198	232-234	209-214
A0A1D2ITN5	226-229	155-158	113-116	198-200	234-236	211-216
A2DHT2	NE	NE	133-136	217-219	254-256	NE
B2LXU3	NE	157-160	NE	NE	235-237	212-217
C6S993	228-231	NE	116-119	200-202	236-238	213-218
C7VDQ3	226-229	155-158	NE	198-200	234-236	211-216
C8UPL3	NE	154-157	113-116	NE	232-234	209-214
F2QGM8	226-229	155-158	113-116	198-200	234-236	211-216
J7M6M6	236-239	165-168	123-126	208-210	244-246	221-226
P47543	NE	161-164	NE	202-204	238-240	215-220
P94915	231-234	162-165	NE	203-205	NE	216-221
P99136	226-229	NE	113-116	198-200	234-236	211-216
P9WN83	231-234	162-165	NE	203-205	NE	216-221
Q05G10	232-235	NE	NE	204-206	NE	NE
Q1J8I3	236-239	165-168	123-126	208-210	244-246	221-226
Q3Y454	227-230	156-159	114-117	199-201	235-237	212-217
Q59906	227-230	156-159	114-117	199-201	235-237	NE
Q8CPY5	226-229	NE	113-116	198-200	234-236	211-216
Q8DXS8	227-230	156-159	114-117	199-201	235-237	212-217
Q8X1X3	NE	156-159	115-118	NE	234-236	211-216
Q92211	NE	155-158	114-117	NE	233-235	210-215
Q9AJT5	218-221	147-150	105-108	190-192	226-228	203-208
U2Z425	226-229	155-158	112-115	198-200	234-236	211-216
W8S2K4	226-229	155-158	NE	NE	234-236	211-216
