# Supplementary material for: Pathogen Moonlighting Proteins: From Ancestral Key Metabolic Enzymes to Virulence Factors
Source: Microorganisms. 2021 Jun 15;9(6):1300. doi: 10.3390/microorganisms9061300 (PMC8232316; doi:10.3390/microorganisms9061300)
Supplement: Supplementary file 1 [file microorganisms-09-01300-s001.zip › Supplementary Information S9.xlsx]

## Sheet: Hoja1
	TAVV	TLTET	IADI	IEDG	MMNI	ATNA	ESGA	FHAL	QLLRI	RTDR	YPII
A0A113S8Y8	NE	NE	381-384	NE	NE	NE	NE	NE	NE	NE	NE
A0A1F1EC06	366-369	348-352	NE	289-292	146-149	387-390	28-31	NE	409-413	400-403	285-288
A4W2T1	366-369	349-353	382-385	290-293	146-149	388-391	28-31	186-189	410-414	401-404	286-289
A8AY46	366-369	NE	381-384	289-292	146-149	387-390	28-31	186-189	409-413	400-403	285-288
A8VHK4	NE	NE	NE	311-314	NE	NE	NE	NE	NE	421-424	306-309
B8Q027	NE	NE	NE	NE	NE	NE	NE	NE	412-416	NE	NE
C1KY94	NE	344-348	377-380	285-288	146-149	383-386	NE	NE	405-409	396-399	281-284
C3LDI0	363-366	345-349	378-381	286-289	146-149	384-387	31-34	186-189	406-410	397-400	NE
C6GGT7	367-370	348-352	382-385	290-293	146-149	388-391	28-31	186-189	410-414	401-404	286-289
C6SKU1	NE	NE	NE	283-286	NE	NE	NE	186-189	403-407	NE	NE
F2QDA9	366-369	348-352	381-384	289-292	146-149	387-390	28-31	186-189	409-413	400-403	285-288
M4ZD78	367-370	349-353	382-385	290-293	146-149	388-391	28-31	186-189	410-414	401-404	286-289
O51312	NE	346-350	NE	287-290	NE	NE	NE	NE	NE	398-401	283-286
O69174	366-369	348-352	381-384	289-292	148-151	387-390	28-31	NE	409-413	400-403	285-288
P0DM31	363-366	345-349	NE	286-289	146-149	384-387	28-31	186-189	406-410	397-400	282-285
P69949	367-370	349-353	382-385	290-293	146-149	388-391	28-31	186-189	410-414	401-404	286-289
P75189	NE	368-372	NE	309-312	NE	NE	NE	200-203	NE	NE	304-307
P9WNL1	NE	340-344	NE	NE	145-148	NE	NE	NE	401-405	NE	NE
Q27727	366-369	NE	NE	NE	NE	NE	NE	NE	422-426	NE	NE
Q3HL75	NE	NE	NE	NE	NE	NE	NE	NE	409-413	NE	NE
Q845Q5	365-368	347-350	380-383	213-216	146-149	386-389	28-31	186-189	408-412	399-402	284-287
Q8DTS9	364-367	346-350	382-385	NE	146-149	385-388	28-31	186-189	407-411	398-401	283-286
Q8GE63	NE	NE	NE	289-292	150-153	NE	NE	NE	NE	NE	NE
Q97QS2	NE	348-352	381-384	289-292	146-149	387-390	31-34	186-189	409-413	400-403	285-288
Q9UAE6	NE	NE	NE	NE	NE	NE	NE	NE	NE	NE	297-300
Q9XDS7	366-369	348-352	381-384	289-292	146-149	NE	28-31	186-189	409-413	400-403	285-288
T1TFA0	367-370	349-353	382-385	290-293	146-149	388-391	28-31	186-189	410-414	401-404	286-289
T1WGD6	NE	NE	382-385	NE	NE	NE	NE	NE	410-414	NE	NE
U2XJZ2	366-369	348-352	381-384	289-292	146-149	387-390	28-31	186-189	409-413	400-403	285-288
V9W1Z1	NE	342-346	375-378	283-286	146-149	381-384	28-31	NE	403-407	394-397	279-282
