# Supplementary material for: Pathogen Moonlighting Proteins: From Ancestral Key Metabolic Enzymes to Virulence Factors
Source: Microorganisms. 2021 Jun 15;9(6):1300. doi: 10.3390/microorganisms9061300 (PMC8232316; doi:10.3390/microorganisms9061300)
Supplement: Supplementary file 1 [file microorganisms-09-01300-s001.zip › Supplementary Information S10.xlsx]

## Sheet: Hoja1
Protein	Position	Annotation	Motif
A0A113S8Y8	384, 385	substrate binding pocket	NE
A0A1F1EC06	291	membrane binding site	IEDG
A4W2T1	187, 188, 401, 403, 412	dimer interface	QLLRI, RTDR
	292	membrane binding site	IEDG
A8AY46	187, 188, 401, 403, 412	dimer interface	QLLRI, RTDR
	291	membrane binding site	IEDG
A8VHK4	421-424	dimer interface	RTDR
	312	membrane binding site	IEDG
B8Q027	415	dimer interface	QLLRI
C1KY94	396-400, 407, 408	dimer interface	QLLRI, RTDR
	287	membrane binding site	IEDG
C3LDI0	34, 187, 188, 397, 398, 401, 408,	dimer interface	QLLRI, RTDR
	288	membrane binding ligand	IEDG
C6GGT7	187, 188, 401, 403, 412	dimer interface	QLLRI, RTDR
	292	membrane binding ligand	IEDG
C6SKU1	187, 188, 405	dimer interface	QLLRI
	285	membrane binding ligand	IEDG
F2QDA9	400-402, 404, 412	dimer interface	QLLRI, RTDR
	291	membrane binding ligand	IEDG
M4ZD78	187, 188	dimer interface	NE
	292	membrane binding ligand	IEDG
O51312	398	dimer interface	RTDR
	289	membrane binding ligand	IEDG
O69174	400-402, 404, 412	dimer interface	QLLRI, RTDR
	291	membrane binding ligand	IEDG
P0DM31	187, 188, 397-401, 408	dimer interface	QLLRI, RTDR
	288	membrane binding ligand	IEDG
P69949	187, 188, 401, 403, 412	dimer interface	QLLRI, RTDR
	292	membrane binding site	IEDG
P75189	202	dimer interface	NE
	310	membrane binding site	IEDG
P9WNL1	403	dimer interface	QLLRI
Q27727	424	dimer interface	QLLRI
Q3HL75	411	dimer interface	QLLRI
Q845Q5	187, 188, 400-402, 410, 411	dimer interface	QLLRI, RTDR
Q8DTS9	187, 188, 398-402, 409, 410	dimer interface	QLLRI, RTDR
Q8GE63	291	membrane binding site	IEDG
Q97QS2	34, 187, 188, 400-402, 404, 412	dimer interface	QLLRI, RTDR
	291	membrane binding site	IEDG
Q9XDS7	187, 188, 400-402, 411, 412	dimer interface	QLLRI, RTDR
	291	membrane binding site	IEDG
T1TFA0	187, 188, 401, 403, 412	dimer interface	QLLRI, RTDR
	292	membrane binding site	IEDG
T1WGD6	412	dimer interface	QLLRI
U2XJZ2	400-402, 404, 412	dimer interface	QLLRI, RTDR
	291	membrane binding ligand	IEDG
V9W1Z1	394, 396, 398, 405	dimer interface	QLLRI, RTDR
	285	membrane binding ligand	IEDG
