# Supplementary material for: Pathogen Moonlighting Proteins: From Ancestral Key Metabolic Enzymes to Virulence Factors
Source: Microorganisms. 2021 Jun 15;9(6):1300. doi: 10.3390/microorganisms9061300 (PMC8232316; doi:10.3390/microorganisms9061300)
Supplement: Supplementary file 1 [file microorganisms-09-01300-s001.zip › Supplementary information S11.xlsx]

## Sheet: Hoja1
ID Uniprot	Protein	Microorganism	Database
A0A1F1EC06	Enolasa	Streptococcus oralis	MultitaskProtDB-II
A8VHK4	Enolasa	Mycoplasma fermentans	MultitaskProtDB-II
C1KY94	Enolasa	Listeria monocytogenes	MultitaskProtDB-II
C3LDI0	Enolasa	Bacillus anthracis	MultitaskProtDB-II
C6SKU1	Enolasa	Neisseria meningitidis	MultitaskProtDB-II
F2QDA9	Enolasa	Streptococcus oralis	MultitaskProtDB-II
M4ZD78	Enolasa	Streptococcus dysgalactiae	MultitaskProtDB-II
O51312	Enolasa	Borrelia burgdorferi	MultitaskProtDB-II
O69174	Enolasa	Staphylococcus aureus	MultitaskProtDB-II
P69949	Enolasa	Streptococcus pyogenes	MultitaskProtDB-II
P75189	Enolasa	Mycoplasma pneumoniae	MultitaskProtDB-II APID
P9WNL1	Enolasa	Mycobacterium tuberculosis	MultitaskProtDB-II
Q3HL75	Enolasa	Leishmania mexicana	MultitaskProtDB-II
Q8DTS9	Enolasa	Streptococcus mutans	MultitaskProtDB-II
Q8GE63	Enolasa	Aeromonas hydrophila	MultitaskProtDB-II
Q97QS2	Enolasa	Streptococcus pneumoniae	MultitaskProtDB-II
Q9XDS7	Enolasa	Streptococcus anginosus	MultitaskProtDB-II
T1WGD6	Enolasa	Taenia pisiformis	MultitaskProtDB-II
U2XJZ2	Enolasa	Streptococcus anginosus	MultitaskProtDB-II
A0A0J1HQ93	GAPDH	Bacillus anthracis	MultitaskProtDB-II
A0A1D2ITN5	GAPDH	Listeria monocytogenes	MultitaskProtDB-II
A2DHT2	GAPDH	Trichomonas vaginalis	MultitaskProtDB-II
B2LXU3	GAPDH	Schistosoma bovis	MultitaskProtDB-II
C8UPL3	GAPDH	Escherichia coli	MultitaskProtDB-II
F2QGM8	GAPDH	Streptococcus oralis	MultitaskProtDB-II
J7M6M6	GAPDH	Streptococcus pyogenes	MultitaskProtDB-II
P99136	GAPDH	Staphylococcus aureus	MultitaskProtDB-II
Q1J8I3	GAPDH	Streptococcus pyogenes	MultitaskProtDB-II
Q3Y454	GAPDH	Streptococcus suis	MultitaskProtDB-II
Q59906	GAPDH	Streptococcus equisimilis	MultitaskProtDB-II
Q8CPY5	GAPDH	Staphylococcus epidermidis	MultitaskProtDB-II
Q8DXS8	GAPDH	Streptococcus pneumoniae	MultitaskProtDB-II
Q9AJT5	GAPDH	Streptococcus pneumoniae	MultitaskProtDB-II
U2Z425	GAPDH	Streptococcus anginosus	MultitaskProtDB-II
W8S2K4	GAPDH	Erysipelothrix rhusiopathiae	MultitaskProtDB-II
