# Supplementary material for: Pathogen Moonlighting Proteins: From Ancestral Key Metabolic Enzymes to Virulence Factors
Source: Microorganisms. 2021 Jun 15;9(6):1300. doi: 10.3390/microorganisms9061300 (PMC8232316; doi:10.3390/microorganisms9061300)
Supplement: Supplementary file 1 [file microorganisms-09-01300-s001.zip › Supplementary Information S12.xlsx]

## Sheet: Hoja1
ENOLASES
Plasminogen	C1KY94
ARG471, ARG504, ARG637, ARG789, ASN790, ASN790, ASN791, ASN791, ASP547, GLU785, LYS468, LYS550, LYS752, SER594, SER669, TRP597, TRP783, TRP783	ARG34, ASN72, ASP124, ASP6, ASP83, GLN127, GLN132, GLN92, GLU28, GLU73, GLU78, GLU96, GLY30, GLY81, LEU126, THR29, THR85
Plasminogen	O69174
ARG471, ARG504, ARG789, ASP461, GLU460, GLU596, LYS468, LYS473, LYS651, PRO655	ALA98, ASP126, GLU416, GLU78, GLU81, GLU83, LYS134, LYS142, LYS94, PRO77
Plasminogen	P69949
ARG367, ARG408, ASN399, ASP357, GLN356, GLU460, GLY437, SER365, SER436, THR369, THR403, THR456, TYR254, TYR406	ALA209, ARG401, ASP157, ASP204, ASP69, GLY197, LYS190, LYS194, LYS211, LYS224, LYS56, LYS56, SER154, SER156, THR200, VAL202
Plasminógeno	P75189
ARG367, ARG408, ARG561, ASN339, GLU395, GLY565, LYS556, LYS557, PHE692, SER383, THR346, THR403, TYR406	ALA160, ALA411, ARG21, ARG23, ARG396, ARG408, ASN404, ASP161, GLU373, GLY207, HIS159, LEU18, LSY67, SER397, THR204, VAL206
Plasminogen	Q3HL75
ARG367, ARG561, ARG561, ASP735, GLN689, GLU395, GLU687, LYS556, SER736, THR346, THR691, VAL563	ARG130, ASN204, ASN408, GLN200, GLU377, GLY125, LEU407, LYS195, PRO398, SER177, SER184
Plasminogen	Q8GE63
ALA568, ARG367, ARG408, ARG561, ARG677, GLN622, GLY565, LEU402, MET404, PHE692, SER383, THR346, THR403, THR691, VAL563	ALA198, ASN161, ASN214, ASP160, ASP254, ASP54, GLU157, GLU250, GLY200, GLY216, LYS197, LYS55, SER41, SN214, THR42, VAL258
Plasminogen	Q97QS2
ALA694, ARG561, ASN625, GLN622, GLY693, LYS556, LYS557, PRO555, THR403, TYR254, TYR406	ARG85, ASP124, ASP6, ASP86, GLN333, GLU127, GLU28, LEU126, TYR125, TYR133
Plasminogen	T1WGD6
ALA694, ARG367, ARG561, ASP357, GLN622, LYS556, LYS557	ASN82, GLU124, GLU415, GLY126, GLY126, LYS125, LYS27, LYS27, LYS419, SER418
