# Supplementary material for: Pathogen Moonlighting Proteins: From Ancestral Key Metabolic Enzymes to Virulence Factors
Source: Microorganisms. 2021 Jun 15;9(6):1300. doi: 10.3390/microorganisms9061300 (PMC8232316; doi:10.3390/microorganisms9061300)
Supplement: Supplementary file 1 [file microorganisms-09-01300-s001.zip › Supplementary Information S13.xlsx]

## Sheet: Hoja1
GAPDH
Plasminogen	A0A0J1HQ93
ALA568, ARG561, ASN625, ASN769, ASP735, ASP740, GLN622, GLU623, GLU627, GLU687, GLU714, GLY590, GLY686, GLY732, GLY733, HIS586, LYS607, LYS770, PHE715, SER736, THR346, THR403, THR688, TYR406	ALA215, ALA294, ALA294, ASN123, ASN226, ASN256, ASN256, ASN38, ASN60, ASN62, GLU103, GLU254, GLU275, GLY61, LEU216, LYS101, LYS191, LYS212, LYS222, LYS260, TYR273, TYR273
Plasminogen	P99136
ALA731, ARG220, ARG561, ARG677, ARG712, ASN769, ASP735, GLN255, GLU172, GLU714, GLY690, GLY732, GLY733, LEU730, PRO252, SER249, SER250, THR253, TYR 713	ARG19, ARG20, ARG326, ARG66, ASN68, ASP62, GLU23, GLU25, GLU333, GLU57, GLU57, GLU71, GLY69, LSY73, LYS46, PHE54, SER267, SER76, THR287, THR55
Plasminogen	Q3Y454
ARG367, ARG389, ARG408, ARG561, ASN396, ASN399, ASP357, ASP357, GLN391, GLN552, GLU395, GLY437, HIS360, HIS390, LEU402, LYS556, PRO398, THR346, THR403, TYR406	ALA261, ALA262, ALA265, ALA267, ARG20, ARG3, ARG53, ASN167, ASN23, ASP269, ASP55, GLU224, GLU25, GLU329, GLU59, GLU66, GLY56, GLY7, LYS333, LYS46, MET1, SER287, THR57, TYR288
Plasminogen	Q8DXS8
ARG561, GLN689, GLU623, GLU632, GLY584, HIS569, LYS556, THR688	ARG80, ASP39, GLU89, LEU37, LYS107, LYS127, SER104, TYR193
Plasminogen	Q9AJT5
ARG767, ASP660, ASP735, GLU627, LYS661, PHE692, THR403	ALA223, ARG212, ARG73, ARG73, LYS66, TYR67, TYR67
Plasminogen	W8S2K4
ALA694, ALA731, ALA731, ARG220, ARG561, ARG561, ARG677, ARG677, ARG719, ARG767, ASP735, ASP740, GLU687, GLY690, HIS729, HIS729, PHE587, SER736	ALA140, ARG77, ARG77, ARG98, ASN123, ASN62, ASN81, ASP125, ASP78, GLU76, GLU76, GLU80, GLU80, LYS191, LYS212, LYS222, THR100, THR207, THR34, VAL73
