# Supplementary figures and images for: Pathogen Moonlighting Proteins: From Ancestral Key Metabolic Enzymes to Virulence Factors
Source: MDPI journal article supplement (doi:10.3390/microorganisms9061300), 2021-06-15

MOONLIGHTING PROTEINS THAT ARE VIRULENCE FACTORS

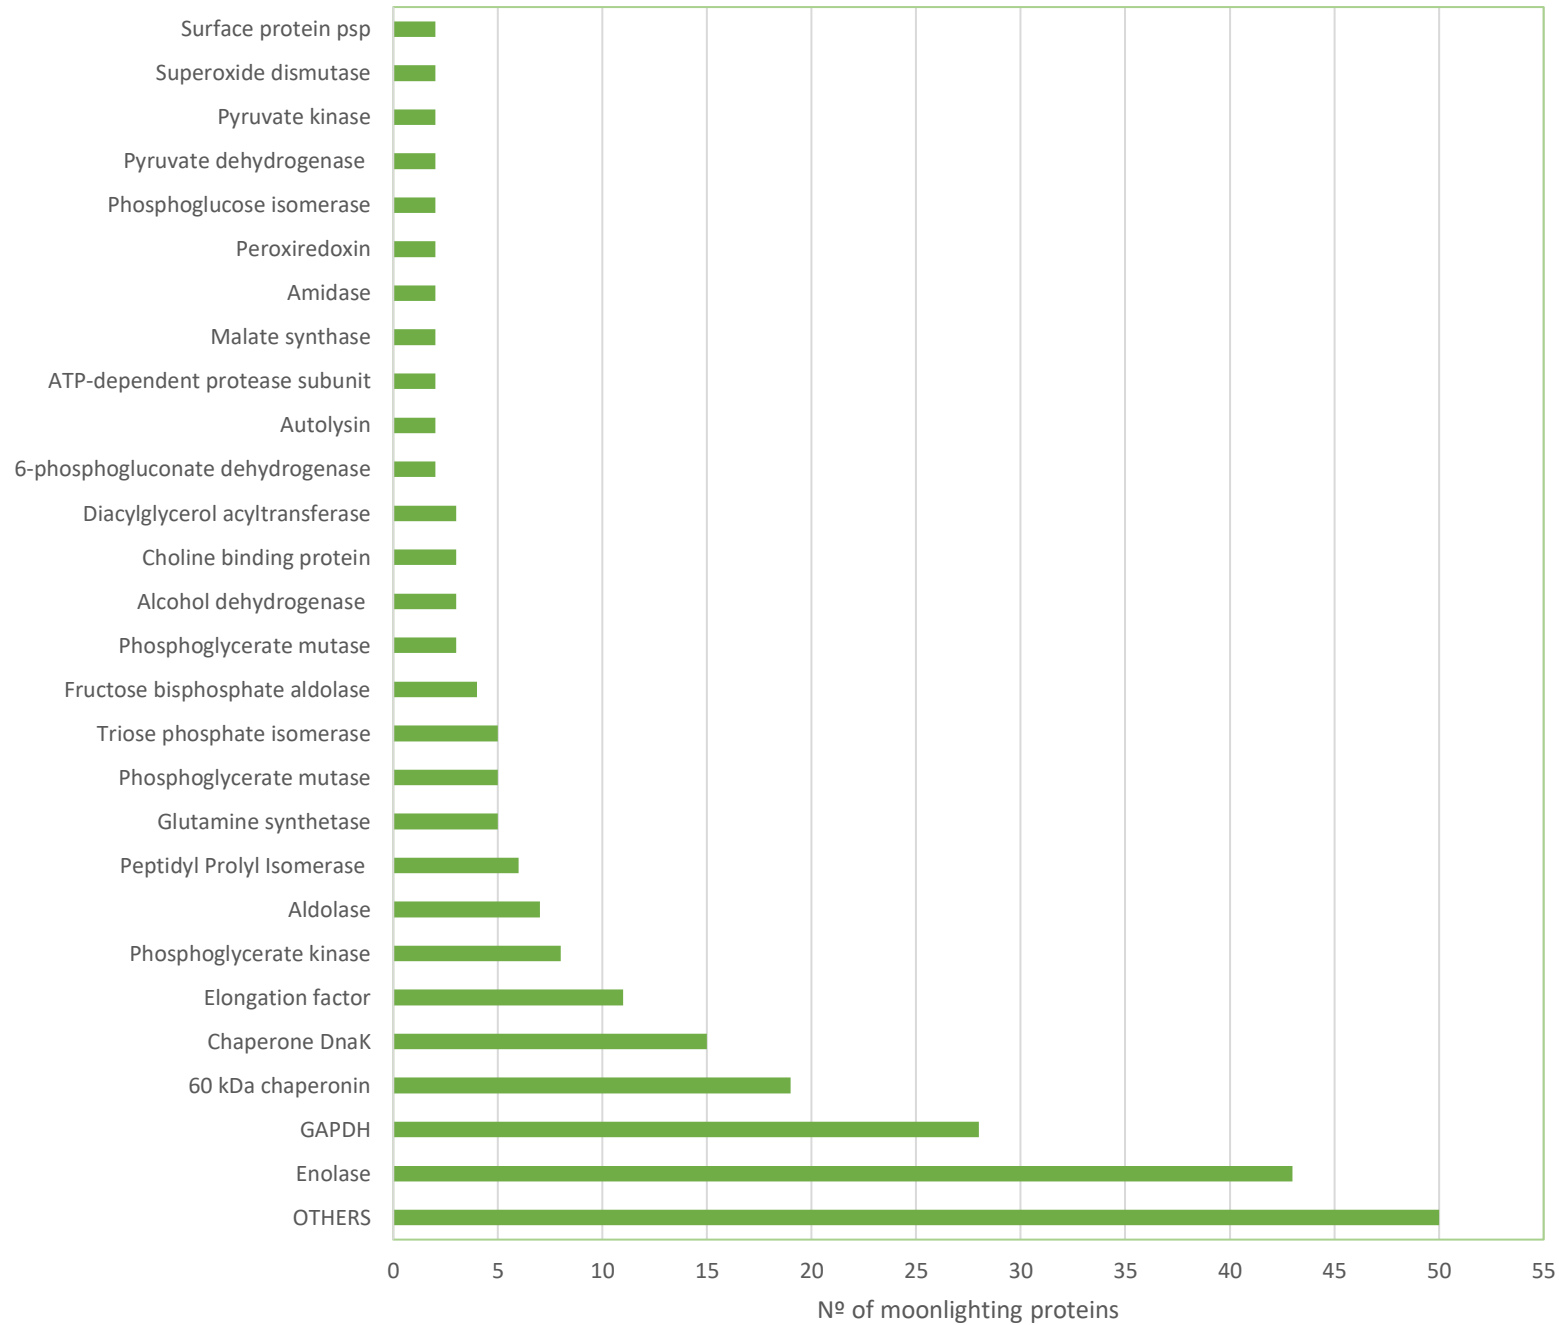

Supplement: s1 [file s1]

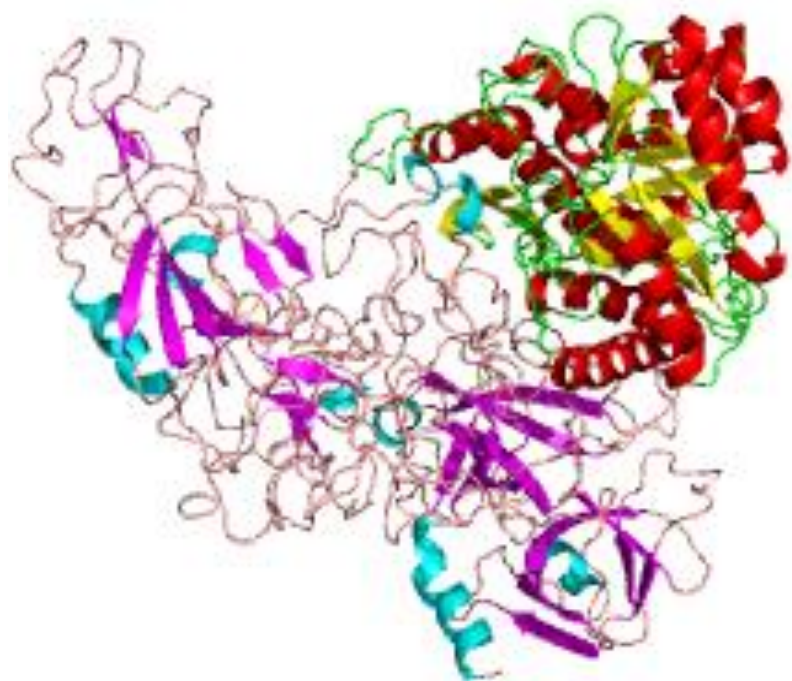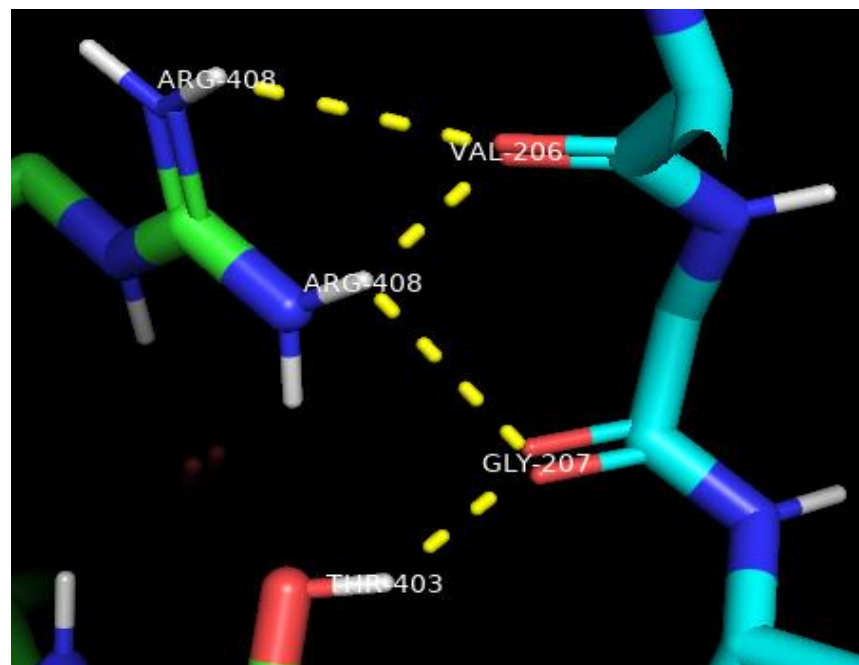

Supplement: s1 [file s1]

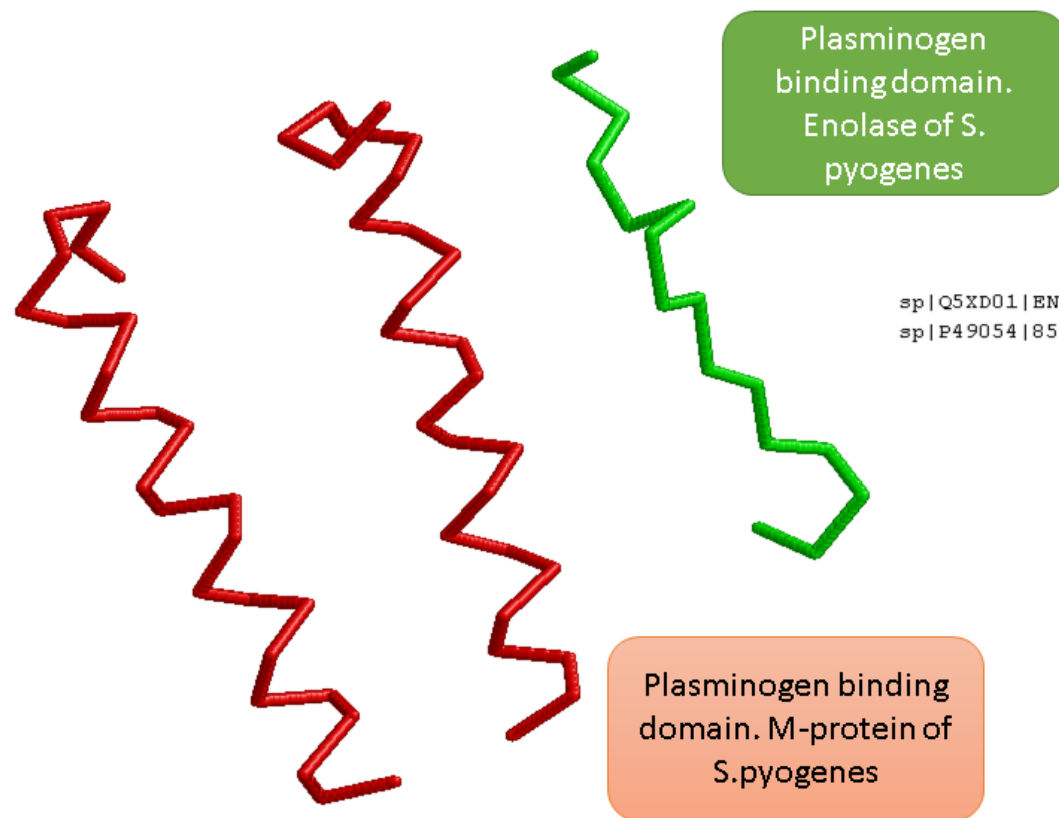

sp|Q5XD01|ENO\_STRP6  
sp|P49054|85-113

-----GEVAQYKGIK----SFYNLK- 17  
VEKLTADAE LQRLKNERHEEAELERLKSE 29  
.\*: : \*. : : : .\*\*.

Supplement: s1 [file s1]
